# Supplementary material for: Prognostic relevance and validation of ARPC1A in the progression of low-grade glioma
Source: publisher site journal article supplement (doi:10.18632/aging.205952), 2024-06-19
Supplement: Supplementary file [file aging-v16-205952-supplementary-material-SD2.pdf]

## SUPPLEMENTARY TABLE

**Supplementary Table 1. Mitochondria-related gene set.**

---

REACTOME\_MITOPHAGY

---

[https://www.gsea-msigdb.org/gsea/msigdb/human/geneset/REACTOME\\_MITOPHAGY](https://www.gsea-msigdb.org/gsea/msigdb/human/geneset/REACTOME_MITOPHAGY)

---

ATG12

ATG5

CSNK2A1

CSNK2A2

CSNK2B

FUNDC1

MAP1LC3A

MAP1LC3B

MFN1

MFN2

MTERF3

PGAM5

PINK1

PRKN

RPS27A

SQSTM1

SRC

TOMM20

TOMM22

TOMM40

TOMM5

TOMM6

TOMM7

TOMM70

UBA52

UBB

UBC

ULK1

VDAC1

---
