# Supplementary material for: Prognostic relevance and validation of ARPC1A in the progression of low-grade glioma
Source: Aging (Albany NY). 2024 Jun 19;16(14):11162–84. doi: 10.18632/aging.205952 (PMC11315382; doi:10.18632/aging.205952)
Supplement: Supplementary Tables 2-6 [file aging-16-205952-s003.xlsx]

## Sheet: Supplementary Table 2
Supplementary Table 2. GSVA algorithm scoring of mitochondrial gene sets based on TCGA and CGGA datasets.
TCGA-S9-A6WQ-01A	-0.162028		CGGA_1006	0.323023
TCGA-S9-A7IS-01A	0.090858		CGGA_1022	-0.047502
TCGA-DU-8162-01A	-0.108384		CGGA_1034	0.087387
TCGA-HT-7858-01A	-0.093495		CGGA_1052	0.14907
TCGA-DU-A5TU-01A	0.322997		CGGA_1079	0.163246
TCGA-S9-A6WO-01A	-0.314107		CGGA_1081	0.108257
TCGA-TM-A84M-01A	-0.160118		CGGA_1140	0.367175
TCGA-HW-A5KL-01A	-0.531266		CGGA_1145	0.376524
TCGA-QH-A6CV-01A	0.280709		CGGA_1263	-0.432574
TCGA-TM-A7CF-02A	-0.538947		CGGA_1280	-0.141929
TCGA-DB-A64P-01A	0.291177		CGGA_1281	0.0906035
TCGA-HT-7485-01A	-0.17641		CGGA_1284	0.330218
TCGA-HT-7687-01A	-0.228377		CGGA_1292	0.40034
TCGA-DU-5870-01A	-0.369397		CGGA_1340	-0.196268
TCGA-E1-5302-01A	-0.0637396		CGGA_1408	-0.426177
TCGA-TQ-A7RR-01A	-0.532296		CGGA_1411	-0.0396032
TCGA-TM-A84T-01A	-0.149492		CGGA_235	0.485536
TCGA-FG-6688-01A	-0.221933		CGGA_269	-0.298803
TCGA-TM-A84H-01A	-0.45443		CGGA_276	-0.450894
TCGA-DU-7294-01A	0.201734		CGGA_323	0.186445
TCGA-DH-A66D-01A	-0.239649		CGGA_330	-0.386359
TCGA-DU-8161-01A	-0.315257		CGGA_426	-0.00922529
TCGA-DU-A6S7-01A	-0.378089		CGGA_448	0.14227
TCGA-DU-A7TA-01A	-0.00840725		CGGA_488	-0.317366
TCGA-DU-A6S8-01A	0.337617		CGGA_493	-0.084242
TCGA-FG-A710-01A	0.279396		CGGA_541	-0.068095
TCGA-CS-4941-01A	0.184982		CGGA_564	-0.334285
TCGA-QH-A6CZ-01A	0.24556		CGGA_565	-0.264458
TCGA-DU-7007-01A	-0.14628		CGGA_578	0.059319
TCGA-HT-7467-01A	-0.446626		CGGA_599	-0.166592
TCGA-S9-A6TX-01A	-0.22757		CGGA_616	-0.385255
TCGA-FG-A60L-01A	-0.160204		CGGA_630	-0.0469671
TCGA-DB-A64Q-01A	0.115681		CGGA_633	-0.665893
TCGA-HT-A4DV-01A	0.309777		CGGA_638	-0.212868
TCGA-KT-A7W1-01A	-0.107498		CGGA_643	-0.106107
TCGA-TQ-A8XE-02A	-0.160035		CGGA_659	0.0485797
TCGA-DH-A7UT-01A	-0.447163		CGGA_661	0.103688
TCGA-HT-8114-01A	-0.346483		CGGA_678	-0.206365
TCGA-P5-A5ET-01A	0.20812		CGGA_727	-0.25304
TCGA-P5-A72U-01A	-0.440737		CGGA_732	0.263821
TCGA-HT-8105-01A	0.206302		CGGA_766	-0.151478
TCGA-FG-6691-01A	0.0467311		CGGA_791	0.289312
TCGA-DU-5870-02A	0.220617		CGGA_796	-0.271778
TCGA-HW-8322-01A	-0.314514		CGGA_807	0.306123
TCGA-DB-A75K-01A	-0.356887		CGGA_871	-0.506583
TCGA-HT-7681-01A	0.479074		CGGA_D06	-0.671828
TCGA-HT-7469-01A	-0.033767		CGGA_D11	0.240717
TCGA-S9-A6WD-01A	0.133506		CGGA_D16	-0.0855313
TCGA-DU-8168-01A	-0.15901		CGGA_D18	0.403206
TCGA-TM-A84J-01A	0.0107883		CGGA_D44	-0.432516
TCGA-TM-A84S-01A	0.0211799		CGGA_D58	0.011329
TCGA-TQ-A7RF-01A	0.260402		CGGA_J030	-0.206395
TCGA-DU-6392-01A	0.466776		CGGA_J130	0.135202
TCGA-E1-A7YW-01A	-0.393554		CGGA_1005	-0.0610396
TCGA-DU-A7TD-01A	-0.398943		CGGA_1013	-0.222884
TCGA-HT-7474-01A	0.0851067		CGGA_1020	-0.290998
TCGA-DU-5855-01A	-0.01828		CGGA_1027	0.536411
TCGA-S9-A7QW-01A	0.272997		CGGA_1031	-0.0118279
TCGA-HT-A619-01A	0.19213		CGGA_1046	-0.230293
TCGA-HT-7692-01A	-0.0876424		CGGA_1050	-0.0734639
TCGA-DU-6405-01A	-0.35123		CGGA_1061	0.0487067
TCGA-E1-A7YQ-01A	-0.16667		CGGA_1094	-0.202008
TCGA-WY-A85A-01A	-0.0320002		CGGA_1113	0.0809405
TCGA-DU-5872-02A	-0.387329		CGGA_1146	-0.329601
TCGA-DB-A64S-01A	0.193291		CGGA_1160	0.432461
TCGA-CS-4943-01A	0.245314		CGGA_1189	-0.0313485
TCGA-E1-A7YO-01A	-0.295221		CGGA_1190	0.0956545
TCGA-TQ-A7RW-01A	-0.459671		CGGA_1215	0.100497
TCGA-DB-A4XA-01A	0.31803		CGGA_1231	-0.559964
TCGA-DH-A669-01A	0.315477		CGGA_1307	0.365514
TCGA-FG-8182-01A	-0.409685		CGGA_1322	0.377189
TCGA-DB-A64R-01A	-0.0873226		CGGA_1329	0.245288
TCGA-RY-A847-01A	0.198028		CGGA_1330	0.285949
TCGA-HT-7476-01A	0.438453		CGGA_1374	0.141908
TCGA-DU-A7T8-01A	-0.18813		CGGA_1388	0.133052
TCGA-DU-6394-01A	-0.0040935		CGGA_1406	0.0746772
TCGA-TM-A84F-01A	-0.281279		CGGA_171	0.306198
TCGA-HW-7493-01A	-0.0558895		CGGA_236	0.0838281
TCGA-DU-7009-01A	0.281648		CGGA_241	-0.181942
TCGA-DU-5849-01A	0.311292		CGGA_245	-0.037053
TCGA-DU-5871-01A	0.0618469		CGGA_251	-0.245828
TCGA-RY-A845-01A	0.00936057		CGGA_252	0.303094
TCGA-HT-7676-01A	0.425802		CGGA_254	-0.31055
TCGA-S9-A6WH-01A	0.0844674		CGGA_256	-0.288784
TCGA-DU-6407-02	0.301502		CGGA_261	0.0414413
TCGA-HT-8104-01A	-0.0980257		CGGA_267	-0.277924
TCGA-HT-A618-01A	-0.150101		CGGA_273	-0.0532956
TCGA-WY-A858-01A	-0.174529		CGGA_283	-0.00301773
TCGA-DU-7010-01A	0.0462397		CGGA_300	0.0880762
TCGA-VM-A8CE-01A	-0.457644		CGGA_314	-0.484248
TCGA-R8-A73M-01A	0.441398		CGGA_333	-0.491386
TCGA-E1-A7Z4-01A	-0.304933		CGGA_337	-0.0550619
TCGA-HT-7874-01A	-0.0700619		CGGA_400	0.226765
TCGA-DH-A7UU-01A	-0.304794		CGGA_431	0.00322439
TCGA-S9-A7IY-01A	-0.339452		CGGA_446	0.0318429
TCGA-E1-A7YD-01A	0.00370443		CGGA_458	0.0096436
TCGA-S9-A7IQ-01A	0.199765		CGGA_479	-0.377928
TCGA-FG-A4MY-01A	-0.347081		CGGA_485	-0.09993
TCGA-HT-7605-01A	-0.169005		CGGA_490	-0.137187
TCGA-DU-6406-01A	0.133817		CGGA_501	-0.00942804
TCGA-DU-6403-01A	-0.163202		CGGA_502	-0.315887
TCGA-HT-7473-01A	-0.468527		CGGA_510	-0.359014
TCGA-TQ-A7RG-01A	-0.226756		CGGA_538	-0.281402
TCGA-P5-A72X-01A	-0.485239		CGGA_543	0.0803721
TCGA-TM-A7CF-01A	-0.43214		CGGA_551	-0.335822
TCGA-E1-5307-01A	0.31254		CGGA_560	-0.208394
TCGA-WH-A86K-01A	0.0685464		CGGA_580	0.0881256
TCGA-E1-A7YM-01A	-0.0403281		CGGA_591	0.107908
TCGA-HW-8319-01A	-0.534586		CGGA_598	0.182789
TCGA-HW-7495-01A	-0.232979		CGGA_601	-0.250137
TCGA-DU-A6S2-01A	-0.331768		CGGA_603	-0.25777
TCGA-P5-A5EV-01A	0.220927		CGGA_605	0.160135
TCGA-CS-5397-01A	-0.00961123		CGGA_607	-0.199683
TCGA-RY-A840-01A	0.468738		CGGA_632	0.00504288
TCGA-CS-6669-01A	0.133507		CGGA_635	-0.200043
TCGA-HT-7694-01A	0.136912		CGGA_641	0.353059
TCGA-DU-8167-01A	0.0849308		CGGA_642	-0.346075
TCGA-FG-8186-01A	-0.173601		CGGA_655	-0.0802355
TCGA-DB-5270-01A	0.205521		CGGA_662	-0.229713
TCGA-FG-A70Y-01A	-0.0265343		CGGA_666	0.403884
TCGA-HW-7487-01A	0.444425		CGGA_671	-0.0845507
TCGA-HT-7616-01A	0.0110568		CGGA_675	0.0109854
TCGA-QH-A65R-01A	0.418015		CGGA_685	-0.453343
TCGA-HT-7686-01A	0.142009		CGGA_689	0.105848
TCGA-DU-6542-01A	-0.0122733		CGGA_694	0.0938286
TCGA-HT-8012-01A	-0.27899		CGGA_698	-0.252532
TCGA-DU-6400-01A	0.411181		CGGA_704	0.00886692
TCGA-DH-5141-01A	0.444876		CGGA_715	0.0905728
TCGA-HT-7873-01B	-0.531571		CGGA_725	-0.622139
TCGA-HT-7608-01A	-0.353172		CGGA_752	-0.26329
TCGA-FG-8188-01A	-0.0532162		CGGA_757	-0.19811
TCGA-HT-7606-01A	0.350607		CGGA_760	-0.378897
TCGA-DU-6397-02A	0.362298		CGGA_762	-0.523961
TCGA-P5-A5F4-01A	0.397119		CGGA_785	-0.135073
TCGA-DU-7292-01A	0.00481439		CGGA_812	-0.0142934
TCGA-QH-A6X8-01A	-0.28573		CGGA_815	-0.225188
TCGA-S9-A6WG-01A	-0.453228		CGGA_818	-0.225738
TCGA-E1-A7YE-01A	-0.28479		CGGA_834	0.066961
TCGA-S9-A6U5-01A	-0.146243		CGGA_835	0.250131
TCGA-W9-A837-01A	0.0553568		CGGA_838	0.0250919
TCGA-F6-A8O4-01A	0.303991		CGGA_843	-0.404698
TCGA-FG-A60J-01A	-0.273466		CGGA_856	0.117189
TCGA-HT-7471-01A	0.134658		CGGA_858	-0.114343
TCGA-CS-5396-01A	-0.21065		CGGA_864	-0.229882
TCGA-FG-A713-01A	-0.152575		CGGA_884	-0.41145
TCGA-DH-A669-02A	0.544325		CGGA_892	-0.166908
TCGA-WY-A85B-01A	0.0427515		CGGA_893	0.0694317
TCGA-HT-7691-01A	-0.0792287		CGGA_898	-0.30833
TCGA-DU-6410-01A	0.373587		CGGA_904	-0.0798607
TCGA-TQ-A7RV-01A	-0.269668		CGGA_905	-0.272529
TCGA-HT-7604-01A	0.296098		CGGA_908	-0.0699861
TCGA-HW-A5KJ-01A	0.210211		CGGA_909	-0.543425
TCGA-S9-A7QX-01A	0.26849		CGGA_D04	0.323109
TCGA-DU-8158-01A	-0.329132		CGGA_D07	-0.425403
TCGA-HT-7688-01A	0.430262		CGGA_D14	0.399608
TCGA-TM-A7C3-01A	-0.215817		CGGA_D15	-0.244543
TCGA-HT-7472-01A	-0.478846		CGGA_D20	0.312854
TCGA-S9-A7R2-01A	-0.362104		CGGA_D21	0.228343
TCGA-VM-A8C8-01A	-0.160592		CGGA_D24	0.265669
TCGA-QH-A6CY-01A	0.130398		CGGA_D27	-0.091681
TCGA-E1-A7YJ-01A	-0.0402555		CGGA_D29	-0.348729
TCGA-HT-8558-01A	0.201939		CGGA_D33	0.305589
TCGA-R8-A6MO-01A	0.0945796		CGGA_D39	0.0753451
TCGA-CS-5394-01A	0.0348381		CGGA_D40	-0.403723
TCGA-P5-A780-01A	-0.393157		CGGA_D45	0.037569
TCGA-R8-A6MK-01A	-0.346203		CGGA_D46	-0.409461
TCGA-HT-A5R5-01A	-0.222735		CGGA_D47	0.177217
TCGA-HT-A74L-01A	-0.422454		CGGA_D48	0.0816684
TCGA-FN-7833-01A	-0.458049		CGGA_D52	0.1009
TCGA-DB-A64W-01A	0.209302		CGGA_D56	-0.311701
TCGA-DU-7018-01A	0.137451		CGGA_277	0.446173
TCGA-FG-8181-01A	0.14436		CGGA_J023	0.322907
TCGA-QH-A6CS-01A	-0.0603533		CGGA_J024	0.181386
TCGA-VM-A8CH-01A	-0.138864		CGGA_J042	0.223217
TCGA-TQ-A8XE-01A	0.254282		CGGA_1004	-0.111959
TCGA-FG-5965-02	0.24907		CGGA_1059	0.470445
TCGA-DB-A4XB-01A	-0.270586		CGGA_1071	0.473484
TCGA-HT-7620-01A	-0.578913		CGGA_1118	0.21324
TCGA-TM-A7C5-01A	0.276748		CGGA_1246	0.402274
TCGA-HT-A615-01A	0.303604		CGGA_243	-0.0477549
TCGA-DB-5274-01A	0.117768		CGGA_247	-0.0869215
TCGA-WY-A85E-01A	0.0586539		CGGA_738	-0.502957
TCGA-FG-A87N-01A	-0.0617149
TCGA-TM-A84G-01A	0.181546
TCGA-DU-6397-01A	0.0287283
TCGA-DH-A7UV-01A	-0.252975
TCGA-HT-7857-01A	-0.366705
TCGA-S9-A6TU-01A	-0.271332
TCGA-FG-A6IZ-01A	0.269173
TCGA-E1-5303-01A	-0.0590866
TCGA-DU-7302-01A	0.14606
TCGA-HW-7491-01A	0.191062
TCGA-RY-A83X-01A	-0.122501
TCGA-FG-5965-01B	-0.394459
TCGA-FG-5962-01B	0.1413
TCGA-DU-A5TY-01A	-0.0950796
TCGA-HW-7486-01A	-0.117133
TCGA-HT-7693-01A	0.290119
TCGA-DB-A75M-01A	-0.404243
TCGA-DU-7301-01A	0.216159
TCGA-KT-A74X-01A	0.243086
TCGA-P5-A5EZ-01A	-0.363343
TCGA-VM-A8CB-01A	0.535451
TCGA-CS-5393-01A	0.0821927
TCGA-DB-A4XF-01A	-0.30776
TCGA-HT-A61B-01A	0.370815
TCGA-DB-A64O-01A	-0.116984
TCGA-S9-A6WI-01A	0.324491
TCGA-S9-A7QZ-01A	-0.303067
TCGA-VM-A8CD-01A	-0.00275612
TCGA-HT-7610-01A	-0.332102
TCGA-CS-6290-01A	-0.303062
TCGA-P5-A5F1-01A	0.253216
TCGA-P5-A5EU-01A	0.19401
TCGA-DU-7011-01A	0.129237
TCGA-DU-A7T6-01A	0.245553
TCGA-TM-A7CA-01A	-0.293678
TCGA-HT-A5R7-01A	0.0720929
TCGA-DU-6395-01A	0.164057
TCGA-HT-A74O-01A	-0.010139
TCGA-FG-7637-01A	0.154577
TCGA-CS-5395-01A	0.160024
TCGA-DU-7008-01A	0.537395
TCGA-TQ-A7RV-02A	-0.542274
TCGA-DU-5847-01A	-0.223171
TCGA-S9-A7R4-01A	-0.147661
TCGA-CS-4942-01A	0.188725
TCGA-HT-7677-01A	-0.409107
TCGA-E1-5304-01A	0.288833
TCGA-TQ-A7RN-01A	-0.16151
TCGA-S9-A6WL-01A	-0.121329
TCGA-QH-A6CW-01A	-0.41151
TCGA-FG-A87Q-01A	-0.308042
TCGA-WY-A85C-01A	-0.314588
TCGA-QH-A6X3-01A	-0.0444154
TCGA-S9-A6TV-01A	-0.0476311
TCGA-TM-A84C-01A	-0.378348
TCGA-S9-A6WN-01A	-0.499152
TCGA-FG-A4MX-01A	-0.469597
TCGA-DB-A64U-01A	-0.149352
TCGA-DU-7014-01A	0.147858
TCGA-HT-7690-01A	0.533903
TCGA-QH-A6X5-01A	-0.326205
TCGA-QH-A86X-01A	-0.344726
TCGA-FG-A4MT-01A	0.335976
TCGA-DU-7015-01A	-0.103485
TCGA-TQ-A7RH-01A	-0.533156
TCGA-HT-A61A-01A	0.0031861
TCGA-E1-5318-01A	0.38553
TCGA-HT-7602-01A	-0.42763
TCGA-FG-A6J3-01A	0.023339
TCGA-HW-7489-01A	0.35888
TCGA-HT-8018-01A	0.0567863
TCGA-DB-5281-01A	-0.172939
TCGA-DB-A64L-01A	0.454244
TCGA-S9-A6WP-01A	0.161395
TCGA-E1-A7YU-01A	-0.131256
TCGA-DU-A5TW-01A	0.217564
TCGA-S9-A6U8-01A	-0.414038
TCGA-DU-8164-01A	-0.0526067
TCGA-DU-8165-01A	-0.0697618
TCGA-P5-A5F6-01A	-0.02106
TCGA-HT-7875-01A	-0.389506
TCGA-E1-A7Z6-01A	-0.492661
TCGA-HT-7882-01A	-0.159169
TCGA-S9-A89Z-01A	0.105945
TCGA-DU-7300-01A	0.37193
TCGA-S9-A7J1-01A	-0.601154
TCGA-S9-A7R8-01A	-0.381719
TCGA-DB-A4XE-01A	0.162163
TCGA-FG-A6J1-01A	0.0786866
TCGA-DB-A64V-01A	-0.099097
TCGA-DU-A6S3-01A	-0.095146
TCGA-DU-A7TB-01A	-0.241539
TCGA-DU-6408-01A	0.00784767
TCGA-TQ-A7RK-01A	-0.00138926
TCGA-S9-A7J3-01A	-0.445977
TCGA-S9-A6TZ-01A	-0.398015
TCGA-HT-7689-01A	-0.109225
TCGA-HT-A74H-01A	-0.418076
TCGA-S9-A6U1-01A	-0.24073
TCGA-TQ-A7RQ-01A	-0.373537
TCGA-E1-5305-01A	0.313864
TCGA-VM-A8C9-01A	0.0472773
TCGA-RY-A83Y-01A	0.410248
TCGA-FG-8187-01A	-0.583998
TCGA-DB-A64X-01A	0.352474
TCGA-DB-A4XD-01A	-0.228154
TCGA-HT-7611-01A	-0.30425
TCGA-TM-A84L-01A	-0.491991
TCGA-S9-A7R7-01A	-0.431579
TCGA-DU-6401-01A	-0.07112
TCGA-QH-A6X9-01A	-0.170117
TCGA-DB-A4XC-01A	-0.426694
TCGA-F6-A8O3-01A	0.370435
TCGA-DB-5278-01A	0.205635
TCGA-HT-8563-01A	-0.353969
TCGA-FG-8185-01A	0.166717
TCGA-E1-A7YH-01A	-0.365219
TCGA-HW-A5KM-01A	-0.130584
TCGA-E1-A7YV-01A	-0.181256
TCGA-HT-A4DS-01A	-0.0106556
TCGA-HT-7483-01A	0.276577
TCGA-HT-7884-01B	-0.609415
TCGA-CS-6667-01A	0.154698
TCGA-DH-5143-01A	0.388834
TCGA-DB-A75O-01A	-0.221692
TCGA-DU-5854-01A	-0.544492
TCGA-P5-A72Z-01A	0.0231426
TCGA-HW-A5KK-01A	-0.474491
TCGA-TQ-A7RI-01A	-0.515642
TCGA-QH-A870-01A	-0.347744
TCGA-RY-A843-01A	-0.369171
TCGA-HT-7475-01A	0.369986
TCGA-DU-A7TJ-01A	-0.208851
TCGA-HW-7490-01A	0.444712
TCGA-E1-5311-01A	0.212236
TCGA-DU-7299-01A	0.0482009
TCGA-E1-A7YS-01A	-0.196178
TCGA-S9-A7J2-01A	-0.163751
TCGA-E1-A7YI-01A	0.257876
TCGA-DU-A76K-01A	-0.00526295
TCGA-CS-5390-01A	0.0274899
TCGA-HT-8019-01A	-0.0260518
TCGA-HT-7468-01A	0.0966095
TCGA-DH-5140-01A	0.407508
TCGA-VW-A7QS-01A	0.315605
TCGA-S9-A6U9-01A	-0.488094
TCGA-FG-7634-01A	-0.270272
TCGA-P5-A77X-01A	-0.0747169
TCGA-HT-8010-01A	-0.543835
TCGA-S9-A6U2-01A	-0.448153
TCGA-HT-8113-01A	0.10828
TCGA-S9-A6TS-01A	0.240986
TCGA-S9-A7R3-01A	-0.447318
TCGA-E1-A7Z2-01A	-0.0582536
TCGA-DU-7309-01A	0.131002
TCGA-HW-8320-01A	-0.107842
TCGA-CS-6668-01A	-0.0978234
TCGA-S9-A6U6-01A	0.0795302
TCGA-DU-6393-01A	-0.133604
TCGA-HT-A74J-01A	-0.346521
TCGA-E1-A7YL-01A	0.200667
TCGA-QH-A6XC-01A	0.036612
TCGA-HT-7609-01A	-0.111564
TCGA-QH-A65X-01A	0.315944
TCGA-P5-A731-01A	-0.107349
TCGA-HT-7695-01A	0.0929713
TCGA-FG-A4MW-01A	-0.0534425
TCGA-E1-A7Z3-01A	-0.185884
TCGA-P5-A5F0-01A	-0.0975136
TCGA-DH-A66F-01A	0.0484359
TCGA-HT-8110-01A	-0.163153
TCGA-VW-A8FI-01A	-0.330165
TCGA-S9-A7R1-01A	0.35257
TCGA-DU-7019-01A	0.493777
TCGA-QH-A65V-01A	0.257746
TCGA-DB-5280-01A	-0.38151
TCGA-FG-A60K-01A	-0.224283
TCGA-HT-7479-01A	-0.304495
TCGA-P5-A737-01A	-0.394905
TCGA-IK-7675-01A	-0.0948303
TCGA-S9-A6WE-01A	0.40268
TCGA-QH-A6CU-01A	-0.164256
TCGA-P5-A781-01A	-0.235268
TCGA-FG-A711-01A	0.315645
TCGA-HT-8108-01A	-0.352654
TCGA-DU-A7TG-01A	0.0390355
TCGA-FG-A4MU-01B	0.0862522
TCGA-TM-A84Q-01A	0.109318
TCGA-DU-6407-01A	0.294784
TCGA-DU-7013-01A	-0.291577
TCGA-HT-8109-01A	-0.471962
TCGA-E1-A7YY-01A	0.10996
TCGA-DU-A6S6-01A	-0.301349
TCGA-HT-8013-01A	-0.293615
TCGA-CS-6670-01A	0.38421
TCGA-E1-5319-01A	-0.018472
TCGA-TQ-A7RK-02	-0.27657
TCGA-TQ-A7RM-01A	-0.0548172
TCGA-HT-7680-01A	-0.343034
TCGA-HT-7902-01A	-0.648909
TCGA-TQ-A7RO-01A	-0.367305
TCGA-DU-A7TI-01A	-0.393619
TCGA-HT-7607-01A	-0.031188
TCGA-P5-A5EW-01A	-0.196478
TCGA-CS-4944-01A	-0.0143382
TCGA-TM-A7C4-01A	-0.0591462
TCGA-DU-A5TS-01A	-0.0124628
TCGA-QH-A6X4-01A	-0.3835
TCGA-P5-A5F2-01A	-0.165008
TCGA-DU-7006-01A	0.0846631
TCGA-HT-A617-01A	0.121458
TCGA-P5-A72W-01A	0.203977
TCGA-FG-7643-01A	0.0517401
TCGA-DU-5874-01A	0.080118
TCGA-S9-A7QY-01A	-0.322888
TCGA-DB-A4XH-01A	-0.49876
TCGA-VV-A86M-01A	0.278105
TCGA-HW-8321-01A	-0.154581
TCGA-DB-A75L-01A	0.0758967
TCGA-R8-A6YH-01A	-0.288478
TCGA-HT-8564-01A	-0.419967
TCGA-DU-6404-02	-0.0410903
TCGA-DU-A5TP-01A	0.195042
TCGA-CS-6666-01A	0.312496
TCGA-DU-7012-01A	-0.427346
TCGA-HT-A5R9-01A	0.125917
TCGA-E1-A7YK-01A	-0.46055
TCGA-HT-7856-01A	-0.30073
TCGA-VM-A8CF-01A	-0.185711
TCGA-HT-8111-01A	-0.340797
TCGA-HT-7881-01A	-0.257009
TCGA-DU-7304-01A	-0.487134
TCGA-DU-5853-01A	-0.390685
TCGA-CS-4938-01B	0.0714592
TCGA-VM-A8CA-01A	0.0636569
TCGA-S9-A6U0-01A	0.0593966
TCGA-DU-6402-01A	0.142936
TCGA-DH-A7US-01A	-0.234756
TCGA-TM-A84R-01A	0.195011
TCGA-HT-7860-01A	-0.224086
TCGA-P5-A730-01A	0.207053
TCGA-DU-A5TT-01A	0.146336
TCGA-R8-A6ML-01A	0.0297077
TCGA-P5-A735-01A	0.0636174
TCGA-DU-6404-01A	-0.35628
TCGA-HT-7854-01A	-0.378976
TCGA-TM-A84I-01A	-0.158771
TCGA-HT-7481-01A	-0.117247
TCGA-P5-A733-01A	-0.121237
TCGA-DU-A7TC-01A	0.422749
TCGA-DU-8166-01A	-0.277619
TCGA-E1-5322-01A	0.25566
TCGA-DU-A76R-01A	-0.393635
TCGA-DB-5277-01A	0.317158
TCGA-HT-7877-01A	-0.477067
TCGA-HT-7684-01A	0.357383
TCGA-S9-A6UB-01A	0.155263
TCGA-S9-A6TY-01A	-0.226267
TCGA-HT-8107-01A	-0.0833923
TCGA-HT-7470-01A	-0.107884
TCGA-HT-7601-01A	-0.395983
TCGA-FG-5964-01A	0.444341
TCGA-DU-A76O-01A	-0.262434
TCGA-P5-A5EY-01A	-0.205522
TCGA-DU-7298-01A	0.342261
TCGA-WY-A85D-01A	0.110093
TCGA-EZ-7264-01A	-0.1026
TCGA-DB-A75P-01A	-0.270442
TCGA-QH-A65Z-01A	0.324662
TCGA-QH-A6XA-01A	0.0282203
TCGA-DH-A66B-01A	0.0548985
TCGA-S9-A7IX-01A	-0.121801
TCGA-DB-5279-01A	0.0884401
TCGA-HT-A5RB-01A	-0.288971
TCGA-FG-7641-01B	-0.364915
TCGA-DB-A4X9-01A	-0.457973
TCGA-FG-7638-01B	0.171926
TCGA-DU-6399-01A	-0.0328209
TCGA-DU-8163-01A	-0.466171
TCGA-P5-A77W-01A	0.166613
TCGA-S9-A6WM-01A	0.21882
TCGA-DU-A76L-01A	0.259046
TCGA-HT-A614-01A	-0.154265
TCGA-CS-6186-01A	0.228829
TCGA-QH-A65S-01A	-0.163255
TCGA-HT-7478-01A	0.135811
TCGA-HT-A61C-01A	0.390864
TCGA-HT-A5RA-01A	0.223474
TCGA-DU-7290-01A	-0.175113
TCGA-WY-A859-01A	0.360092
TCGA-HT-7482-01A	0.148063
TCGA-HT-8015-01B	-0.052285
TCGA-P5-A736-01A	-0.462931
TCGA-DB-5275-01A	0.0764612
TCGA-P5-A5EX-01A	0.332795
TCGA-S9-A7IZ-01A	-0.175558
TCGA-DU-7306-01A	0.214403
TCGA-RY-A83Z-01A	0.242214
TCGA-DB-A4XG-01A	0.258625
TCGA-S9-A89V-01A	-0.475888
TCGA-TM-A84O-01A	-0.217287
TCGA-TM-A84B-01A	-0.0512971
TCGA-DU-7304-02A	-0.258351
TCGA-TQ-A7RS-01A	-0.055047
TCGA-DU-6396-01A	-0.281088
TCGA-DU-5852-01A	0.452345
TCGA-FG-A4MT-02A	0.287257
TCGA-HT-8011-01A	0.272823
TCGA-DH-5144-01A	0.361835
TCGA-HT-7855-01A	-0.0308576
TCGA-FG-6690-01A	-0.203702
TCGA-HT-7879-01A	-0.565986
TCGA-FG-8191-01A	-0.206254
TCGA-HT-7603-01A	0.614752
TCGA-DH-5142-01A	0.44255
TCGA-QH-A6CX-01A	-0.413376
TCGA-FG-8189-01B	0.11368
TCGA-E1-A7YN-01A	-0.328944
TCGA-CS-6188-01A	0.106042
TCGA-HT-A74K-01A	0.0996507
TCGA-FG-7636-01A	0.0676894
TCGA-DU-5872-01A	0.284755
TCGA-HT-7480-01A	-0.292635
TCGA-FG-A70Z-01A	0.366425
TCGA-IK-8125-01A	-0.117396
TCGA-FG-5963-01A	-0.337409
TCGA-TQ-A7RP-01A	-0.133132
TCGA-HT-7880-01A	-0.31434
TCGA-DH-A7UR-01A	0.302799
TCGA-S9-A6UA-01A	-0.248178
TCGA-S9-A6TW-01A	0.0246984
TCGA-HT-A5RC-01A	-0.366839
TCGA-HT-A616-01A	0.359105
TCGA-DU-A5TR-01A	-0.352563
TCGA-FG-5963-02A	-0.0859851
TCGA-HT-7477-01B	-0.252692
TCGA-FG-6689-01A	0.277567
TCGA-DB-5273-01A	0.13245
TCGA-VV-A829-01A	0.368512
TCGA-DH-A66G-01A	-0.412616
TCGA-FG-6692-01A	0.0503064
TCGA-TQ-A7RJ-01A	-0.356116
TCGA-S9-A7J0-01A	-0.0169603

## Sheet: Supplementary Table 3
Supplementary Table 3. Intersecting gene sets for mitochondria-related gene sets based on TCGA and CGGA datasets.
NDUFAF2
FAM89B
PSMB6
MRPS11
ZNF622
PSMB5
RAN
ZFHX3
PRPF19
SLBP
PPIA
NDUFB5
CIAPIN1
DCTPP1
SRPRB
MRPS35
RPL26L1
AHNAK
METTL5
BLVRA
ZNHIT3
HSP90AB1
EIF6
UQCRH
CCT8
PSMG2
CCT7
XRCC6
COPS3
DYNLRB1
MRPS10
SNRPD1
THOC7
COMMD7
COA6
ARF1
FARSB
STIP1
PPP1R11
HINT1
PGK1
RNF8
TRIAP1
HAX1
IMMT
NDUFA8
EEF1E1
DRG1
GAPDH
NME1
GLO1
COX7A2L
POLR2K
CDKN2AIPNL
FAM32A
PEX11B
MRPL28
MRPL15
CHCHD4
NDUFAB1
SNRNP27
PSMD14
POLDIP2
NFU1
DGUOK
COX4I1
LSM4
MRPL14
SNRPB2
PSMB7
BRIX1
CCT2
EIF5A
DDX10
MED27
MRPL44
OLA1
TPI1
FIBP
SUMO1
TMEM203
C16orf91
MRPS23
PRELID1
TOMM34
MEA1
MKKS
TIMM23
VBP1
DNAH1
SRP19
VDAC3
CDK5
MMADHC
RMND1
TRMT10C
RSL24D1
PHB
NCAM1-AS1
DYNC1LI1
MCTS1
SLC25A11
PPME1
RPP40
PSMB3
CMSS1
NHP2
DSTN
MRPL21
SUPT4H1
SSR2
PPA1
TMEM183A
VDAC1
EMC4
DNAJA2
TAF9
VDAC2
DCTN3
COX8A
PSMG1
FUNDC2
FAM227A
FKBP1A
MRPL3
MRPL47
MAD2L1BP
C1orf43
LYRM4
NDUFB11
LCMT1
DDX1
MROH7
IMP3
NEDD8
MLLT11
AP2M1
POLR3K
TMEM126A
COX5A
MRPS7
NDUFAF4
PFDN1
PSMG3
PFDN4
TIMM22
NT5C3B
BRK1
COX7C
ARF5
MRPL9
ARPC1A
MRPL17
CISD1
TBCA
UBE2V2
NDUFS4
PSMD4
CCT4
POP7
PLEC

## Sheet: Supplementary Table 4
Supplementary Table 4. Results of KEGG enrichment analysis for 161 genes.
ID	Description	GeneRatio	BgRatio	pvalue	p.adjust	qvalue	geneID	Count
hsa04110	Cell cycle	14/146	157/8673	3.4854e-07	7.91186e-05	7.301e-05	891/898/991/1111/8454/1869/8379/4171/4175/5001/5111/9088/9232/9319	14
hsa03030	DNA replication	7/146	36/8673	1.83992e-06	0.000208831	0.000192708	4171/4175/5111/5425/5982/6119/6742	7
hsa03050	Proteasome	7/146	46/8673	1.0249e-05	0.000775509	0.000715634	11047/5688/5691/5692/5701/5719/5714	7
hsa03430	Mismatch repair	5/146	23/8673	3.32595e-05	0.00188748	0.00174175	5111/5425/5982/6119/6742	5
hsa04114	Oocyte meiosis	10/146	131/8673	6.80977e-05	0.00278127	0.00256654	108/6790/891/898/991/8454/8379/9088/9232/441272	10
hsa03420	Nucleotide excision repair	7/146	63/8673	8.34455e-05	0.00278127	0.00256654	5111/5425/5437/5439/5441/5982/6119	7
hsa01232	Nucleotide metabolism	8/146	85/8673	8.57661e-05	0.00278127	0.00256654	79077/1716/3614/3704/4830/22978/51251/7083	8
hsa05016	Huntington disease	14/146	306/8673	0.000623956	0.0177048	0.0163378	11047/1175/56901/4713/5437/5439/5441/5688/5691/5692/5701/5719/5714/27089	14
hsa05110	Vibrio cholerae infection	5/146	50/8673	0.00145398	0.0366726	0.0338411	9296/11014/9601/23480/9414	5
hsa05012	Parkinson disease	12/146	266/8673	0.00172775	0.0392199	0.0361918	11047/56901/4713/5688/5691/5692/5701/5719/5714/201266/7295/27089	12
hsa03010	Ribosome	9/146	170/8673	0.00224839	0.0463986	0.0428162	65003/29088/63875/51069/29093/64983/51073/65005/6183	9
hsa00240	Pyrimidine metabolism	5/146	58/8673	0.00282407	0.0534221	0.0492974	79077/4830/22978/51251/7083	5
hsa03440	Homologous recombination	4/146	41/8673	0.00481285	0.0840383	0.0775499	29086/5425/6119/6742	4
hsa05010	Alzheimer disease	14/146	384/8673	0.00518298	0.0840383	0.0775499	11047/1020/2597/5605/56901/4713/5688/5691/5692/5701/5719/5714/201266/27089	14
hsa04914	Progesterone-mediated oocyte maturation	6/146	102/8673	0.00735807	0.111352	0.102755	108/6790/891/8379/9088/441272	6
hsa05014	Amyotrophic lateral sclerosis	13/146	364/8673	0.0082672	0.117291	0.108235	11047/56901/4713/10718/29107/5688/5691/5692/5701/5719/5714/10452/27089	13
hsa05017	Spinocerebellar ataxia	7/146	143/8673	0.010354	0.138257	0.127582	11047/5688/5691/5692/5701/5719/5714	7
hsa00983	Drug metabolism - other enzymes	5/146	80/8673	0.0110445	0.139283	0.128529	2990/3614/3704/4830/7083	5
hsa05166	Human T-cell leukemia virus 1 infection	9/146	222/8673	0.0125484	0.14992	0.138345	108/898/991/1111/1869/8379/5605/9232/5901	9
hsa04218	Cellular senescence	7/146	156/8673	0.0161185	0.177217	0.163535	891/898/1111/1869/28996/5605/4605	7
hsa05020	Prion disease	10/146	272/8673	0.0163945	0.177217	0.163535	11047/56901/4713/5688/5691/5692/5701/5719/5714/27089	10
hsa03020	RNA polymerase	3/146	34/8673	0.0191021	0.197099	0.181881	5437/5439/5441	3
hsa00230	Purine metabolism	6/146	128/8673	0.0208268	0.205551	0.189681	108/1716/3614/3704/4830/22978	6
hsa05170	Human immunodeficiency virus 1 infection	8/146	212/8673	0.0265973	0.251566	0.232143	8907/1174/891/1111/8454/2783/3984/5605	8
hsa03040	Spliceosome	8/146	217/8673	0.0299991	0.272392	0.251361	8896/25804/23658/6100/6628/6629/6631/6633	8
hsa03410	Base excision repair	3/146	44/8673	0.0374607	0.327061	0.301809	5111/5425/5982	3
hsa00531	Glycosaminoglycan degradation	2/146	19/8673	0.0399128	0.335564	0.309655	2990/60495	2
hsa00532	Glycosaminoglycan biosynthesis - chondroitin sulfate / dermatan sulfate	2/146	21/8673	0.0479617	0.388832	0.358811	54480/51363	2

## Sheet: Supplementary Table 5
Supplementary Table 5. Acquisition process of 282 fetched intersection genes.
TCGA-result	Gene	cor	pvalue		CGGA-result	Gene	cor	pvalue		intersection operation
	AAGAB	0.422869	3.45518e-24			ABLIM1	-0.490136	2.17449e-12		ABLIM1
	ABCB8	0.459017	1.01617e-28			ABRACL	0.488702	2.57461e-12		ABRACL
	ABCF2	0.610729	5.52782e-55			AC004019.13	-0.411571	7.83381e-09		ACBD5
	ABHD11	0.404008	4.94876e-22			AC005789.11	0.449616	1.92572e-10		ADCK2
	ABI1	-0.459611	8.46964e-29			AC011747.7	-0.419667	3.69821e-09		ADCY2
	ABI3BP	-0.438867	3.97949e-26			AC092295.7	0.43526	8.22983e-10		ADD3
	ABLIM1	-0.40186	8.53925e-22			AC093616.4	0.439235	5.54206e-10		ADRM1
	ABRACL	0.433827	1.66656e-25			AC093673.5	0.567159	6.99524e-17		AHCYL1
	AC005229.4	0.463165	2.82708e-29			ACADSB	-0.519489	5.72743e-14		AHNAK
	AC006001.4	0.541458	2.5223e-41			ACBD5	-0.51339	1.25511e-13		AKR1B1
	AC025449.1	0.476249	4.44933e-31			ACBD7	-0.442951	3.8117e-10		ALDH6A1
	AC092171.2	0.429827	5.1043e-25			ACP2	0.411385	7.96779e-09		ALKBH4
	AC092718.4	0.502791	5.52768e-35			ACTB	0.442484	3.996e-10		AP1M1
	AC093673.1	0.543085	1.30773e-41			ADAM12	0.45698	8.90133e-11		AP1S1
	AC093673.2	0.467222	7.95433e-30			ADAM19	0.501378	5.62668e-13		AP2S1
	ACBD5	-0.476841	3.67107e-31			ADARB2	-0.445032	3.08458e-10		AP4M1
	ACOT8	0.435325	1.09134e-25			ADCK2	0.468683	2.51246e-11		AP5Z1
	ACTR3B	0.402138	7.95971e-22			ADCY2	-0.492064	1.73045e-12		ARAP3
	ADCK2	0.401213	1.0057e-21			ADCYAP1R1	-0.459715	6.65157e-11		ARF5
	ADCY2	-0.433606	1.77315e-25			ADD3	-0.496089	1.06934e-12		ARMC10
	ADD3	-0.43091	3.77591e-25			ADHFE1	-0.421773	3.03238e-09		ARPC4
	ADRM1	0.484537	2.91829e-32			ADIPOR2	-0.465636	3.50864e-11		ASCC1
	AHCYL1	-0.416142	2.10446e-23			ADPRHL2	0.402866	1.71758e-08		ASF1B
	AHNAK	-0.43687	7.03937e-26			ADRA1A	-0.471566	1.82605e-11		ASNS
	AKR1B1	0.473185	1.19547e-30			ADRM1	0.487309	3.03165e-12		ATP6V1F
	AL035461.3	0.454095	4.53255e-28			AFAP1L1	0.420581	3.3936e-09		AURKA
	AL157392.3	-0.418744	1.05129e-23			AGAP2-AS1	0.400158	2.18271e-08		BABAM1
	AL355916.2	-0.438971	3.86253e-26			AGK	0.444902	3.12603e-10		BCL7B
	ALDH6A1	-0.437435	5.99292e-26			AHCYL1	-0.457188	8.70651e-11		BET1
	ALG3	0.427961	8.56251e-25			AHNAK	-0.463375	4.48542e-11		BOLA3
	ALKBH4	0.69829	5.73252e-78			AIFM1	0.407469	1.13717e-08		BRI3
	ALYREF	0.400161	1.31119e-21			AK2	0.406456	1.24584e-08		BUD31
	ANAPC7	0.465619	1.31558e-29			AKAP6	-0.470103	2.14777e-11		C11orf80
	AP1M1	0.534189	4.53927e-40			AKR1B1	0.442208	4.1095e-10		C12orf45
	AP1S1	0.61078	5.38612e-55			AKR1C3	-0.427617	1.73545e-09		C17orf58
	AP2S1	0.459396	9.04705e-29			ALAS1	0.443507	3.60253e-10		C20orf194
	AP4M1	0.56832	3.07014e-46			ALDH2	-0.542659	2.50906e-15		C8orf76
	AP5Z1	0.443089	1.17719e-26			ALDH5A1	-0.51543	9.67139e-14		CALN1
	APPL2	-0.403315	5.9036e-22			ALDH6A1	-0.548776	1.05493e-15		CARHSP1
	APTR	0.41916	9.40332e-24			ALDOC	-0.540236	3.51983e-15		CASP2
	ARAP3	0.446593	4.22686e-27			ALKBH4	0.560682	1.85504e-16		CCDC137
	ARF5	0.704171	8.16119e-80			AMER2	-0.499782	6.83748e-13		CCDC34
	ARMC10	0.609838	8.70888e-55			AMOT	-0.490548	2.07116e-12		CCM2
	ARMC7	0.410216	9.99685e-23			ANXA2R	0.409669	9.31764e-09		CCNB1
	ARPC4	0.449641	1.71786e-27			AP1M1	0.494842	1.24222e-12		CCNE1
	ASCC1	-0.431377	3.31423e-25			AP1S1	0.49988	6.7562e-13		CCT8
	ASF1B	0.488111	8.81122e-33			AP2S1	0.509797	1.97817e-13		CD38
	ASNS	0.509778	4.53118e-36			AP4M1	0.513673	1.21065e-13		CDC20
	ATG101	0.408319	1.63557e-22			AP5Z1	0.553279	5.51106e-16		CDC37
	ATP2A1-AS1	0.404594	4.26078e-22			ARAP3	0.519693	5.57772e-14		CDCA8
	ATP5MC1	0.471791	1.86791e-30			ARCN1	0.4117	7.7417e-09		CDH20
	ATP5MF	0.683314	1.83521e-73			ARF1	0.444188	3.36176e-10		CDK5
	ATP5PD	0.42342	2.97458e-24			ARF4	0.50236	4.9879e-13		CDKN3
	ATP6V1F	0.52173	5.47835e-38			ARF5	0.65193	2.11646e-23		CENPM
	AURKA	0.463777	2.33734e-29			ARHGEF26-AS1	-0.43275	1.05369e-09		CENPW
	AURKB	0.430534	4.19345e-25			ARHGEF4	-0.425936	2.03998e-09		CEP350
	BABAM1	0.456597	2.12567e-28			ARL4C	0.497939	8.55311e-13		CHCHD3
	BAG3	-0.407322	2.11588e-22			ARMC10	0.420628	3.37852e-09		CHEK1
	BAX	0.400259	1.27905e-21			ARMC9	0.448743	2.10759e-10		CHPF2
	BCAP31	0.464889	1.65263e-29			ARPC2	0.430278	1.34132e-09		CHST15
	BCL7B	0.67692	1.27537e-71			ARPC4	0.434013	9.307e-10		CKS2
	BET1	0.510811	3.11565e-36			ARRB1	-0.41302	6.85908e-09		CLPTM1L
	BIRC5	0.466319	1.05618e-29			ASCC1	-0.40101	2.02461e-08		CMSS1
	BLVRA	0.465968	1.17912e-29			ASF1B	0.44766	2.35659e-10		CNPY4
	BNIP1	0.419839	7.83517e-24			ASH1L	-0.40081	2.06071e-08		COA1
	BOD1	0.518088	2.14361e-37			ASL	0.402685	1.74542e-08		COMMD7
	BOLA3	0.496897	4.36142e-34			ASNS	0.606567	1.13783e-19		COPS6
	BORCS8	0.458111	1.34054e-28			ATAD3A	0.417566	4.50211e-09		CPSF4
	BRAT1	0.400224	1.29053e-21			ATF5	0.430907	1.26168e-09		CSDC2
	BRI3	0.456374	2.27472e-28			ATG9B	0.450115	1.82866e-10		CUL1
	BUD23	0.571766	6.66358e-47			ATOH8	-0.400187	2.17716e-08		DAAM2
	BUD31	0.714097	4.89148e-83			ATP1A2	-0.418081	4.29069e-09		DAP3
	C11orf80	0.425874	1.52126e-24			ATP1B3	0.506192	3.1057e-13		DBNL
	C12orf10	0.441313	1.96917e-26			ATP5J2	0.752395	1.82256e-34		DCPS
	C12orf45	0.468843	4.76907e-30			ATP5L	0.448048	2.26418e-10		DCTPP1
	C14orf132	-0.437021	6.74292e-26			ATP5SL	0.410742	8.44996e-09		DDX49
	C16orf91	0.480626	1.06524e-31			ATP6V0B	0.510298	1.85715e-13		DDX56
	C17orf58	0.420315	6.89412e-24			ATP6V1F	0.578742	1.15852e-17		DGUOK
	C19orf48	0.421976	4.40151e-24			ATP9A	-0.552814	5.89549e-16		DNAJC2
	C1orf198	-0.459682	8.28508e-29			ATR	0.470566	2.04039e-11		DNAJC30
	C20orf194	-0.471707	1.91848e-30			AURKA	0.401963	1.86088e-08		DOCK1
	C7orf26	0.474793	7.12593e-31			AXIN2	-0.411015	8.24177e-09		DSN1
	C7orf50	0.510885	3.0324e-36			B3GALT6	0.403942	1.56054e-08		E2F1
	C8orf76	0.406678	2.49776e-22			BABAM1	0.439814	5.2297e-10		ECT2
	CALN1	-0.422242	4.09573e-24			BBC3	0.423611	2.54723e-09		EIF3K
	CARHSP1	0.446711	4.08332e-27			BCAP29	0.40641	1.25109e-08		EIF6
	CASP2	0.435156	1.14481e-25			BCAT1	0.455682	1.02115e-10		ELOF1
	CBX3	0.424432	2.25707e-24			BCL3	0.448802	2.09487e-10		EPB41L2
	CCDC137	0.458691	1.12274e-28			BCL7B	0.641067	1.88804e-22		FABP5
	CCDC34	0.43446	1.39406e-25			BEND3P3	-0.450865	1.6916e-10		FAM136A
	CCDC74A	0.40951	1.20105e-22			BET1	0.544391	1.96683e-15		FAM168A
	CCM2	0.532522	8.71789e-40			BOLA2B	0.439802	5.23605e-10		FAM3C
	CCNB1	0.545091	5.79183e-42			BOLA3	0.464512	3.96502e-11		FASTK
	CCNB2	0.420628	6.33693e-24			BRI3	0.556286	3.55266e-16		FKBP1A
	CCNE1	0.444572	7.64229e-27			BUD31	0.74703	9.58967e-34		FLAD1
	CCNF	0.435376	1.07573e-25			C11orf31	0.417935	4.34983e-09		FOXO4
	CCT8	0.424418	2.26553e-24			C11orf80	0.426746	1.88732e-09		GALNT13
	CD320	0.452813	6.6635e-28			C11orf83	0.401302	1.97298e-08		GAN
	CD38	-0.401112	1.03156e-21			C12orf45	0.414367	6.05854e-09		GAPDH
	CDC20	0.433369	1.89594e-25			C16orf93	0.429464	1.45159e-09		GEMIN7
	CDC37	0.42123	5.38532e-24			C17orf58	0.421812	3.02118e-09		GGCT
	CDCA5	0.486867	1.33906e-32			C19orf10	0.495012	1.21714e-12		GGH
	CDCA8	0.41605	2.1567e-23			C19orf24	0.567837	6.30873e-17		GGTA1P
	CDH20	-0.402194	7.84746e-22			C19orf53	0.462884	4.73055e-11		GINS1
	CDK1	0.42415	2.43784e-24			C1orf86	0.401564	1.92789e-08		GJC1
	CDK16	0.437637	5.65763e-26			C20orf194	-0.472218	1.69832e-11		GLUD1
	CDK5	0.63439	1.8224e-60			C21orf59	0.461783	5.32737e-11		GNB2
	CDKN2AIPNL	0.47617	4.564e-31			C6orf141	0.40636	1.2567e-08		GPR75
	CDKN3	0.486839	1.35157e-32			C7orf41	-0.449896	1.87071e-10		GPRC5B
	CDT1	0.448185	2.64403e-27			C7orf43	0.561043	1.75791e-16		GSTK1
	CENPH	0.502413	6.31915e-35			C7orf55-LUC7L2	0.419475	3.76577e-09		GTF3A
	CENPM	0.489332	5.83173e-33			C8orf76	0.465893	3.41153e-11		GTPBP10
	CENPN	0.414567	3.19381e-23			CADM2	-0.439802	5.23591e-10		GUSB
	CENPU	0.41781	1.34948e-23			CALCOCO2	-0.473185	1.52447e-11		HDAC3
	CENPW	0.482119	6.51259e-32			CALN1	-0.491591	1.83042e-12		HIPK2
	CENPX	0.409157	1.31644e-22			CALU	0.426484	1.93539e-09		HPSE2
	CEP350	-0.412799	5.08843e-23			CAMK2G	-0.40745	1.13917e-08		IGFBP2
	CEP41	0.412485	5.52512e-23			CAPNS1	0.508695	2.27185e-13		IKZF5
	CFAP298	0.413838	3.87146e-23			CARHSP1	0.46612	3.32806e-11		IMMT
	CHAF1A	0.501721	8.06667e-35			CARS	0.456352	9.51315e-11		IMPDH1
	CHCHD3	0.495549	6.95743e-34			CARS2	0.457865	8.10205e-11		ITPA
	CHEK1	0.477725	2.75396e-31			CASP2	0.420592	3.39018e-09		KCNN3
	CHPF2	0.509965	4.23519e-36			CBR3	0.4187	4.0493e-09		KDELR2
	CHST15	-0.416569	1.87872e-23			CCDC107	0.449456	1.95788e-10		KIAA1671
	CISD2	0.408536	1.54642e-22			CCDC109B	0.480218	6.88405e-12		KLHL5
	CKS1B	0.464009	2.17448e-29			CCDC137	0.416139	5.14173e-09		KPNA2
	CKS2	0.435065	1.17485e-25			CCDC160	-0.404651	1.4648e-08		KTI12
	CLN6	0.412904	4.95014e-23			CCDC18	0.433931	9.38257e-10		LAMTOR4
	CLN8	-0.421664	4.78923e-24			CCDC34	0.400041	2.20535e-08		LIMK1
	CLPP	0.402337	7.56718e-22			CCM2	0.411422	7.94108e-09		LRP1B
	CLPTM1L	0.485021	2.48364e-32			CCNB1	0.494957	1.22524e-12		LRWD1
	CMSS1	0.451245	1.06564e-27			CCNE1	0.456303	9.56254e-11		LSM4
	CNPY4	0.491507	2.78531e-33			CCNY	-0.402773	1.73185e-08		LSM5
	COA1	0.498318	2.66083e-34			CCT6A	0.63819	3.32153e-22		MAD1L1
	COA6	0.410938	8.28242e-23			CCT8	0.510928	1.71526e-13		MALSU1
	COA8	0.444783	7.18534e-27			CCZ1	0.440487	4.88763e-10		MAP2K2
	COMMD7	0.519691	1.17798e-37			CD101	0.429604	1.43206e-09		MCAT
	COPS3	0.492307	2.11989e-33			CD151	0.450548	1.74827e-10		MCM2
	COPS6	0.710937	5.373e-82			CD248	0.452677	1.40035e-10		MCM6
	COX19	0.407594	1.97269e-22			CD276	0.433019	1.02625e-09		MDH2
	CPSF4	0.534843	3.50879e-40			CD38	-0.415538	5.43664e-09		MED10
	CRCP	0.525428	1.34844e-38			CD63	0.411045	8.21948e-09		MIS18A
	CSDC2	-0.443746	9.7244e-27			CDC20	0.415824	5.29448e-09		MOSPD3
	CTU2	0.42072	6.18114e-24			CDC37	0.467999	2.70867e-11		MPLKIP
	CUL1	0.520525	8.62002e-38			CDC42	0.460876	5.87324e-11		MRGBP
	CYCS	0.4179	1.31759e-23			CDC6	0.414469	6.00142e-09		MRPL11
	DAAM2	-0.490926	3.39488e-33			CDCA8	0.408684	1.0189e-08		MRPL15
	DAAM2-AS1	-0.428363	7.66127e-25			CDH20	-0.54935	9.71655e-16		MRPL17
	DAP3	0.401549	9.2376e-22			CDK5	0.438779	5.80093e-10		MRPL2
	DBF4	0.471148	2.29314e-30			CDKN3	0.453157	1.3318e-10		MRPL22
	DBNL	0.438049	5.02971e-26			CDR1	-0.402999	1.69736e-08		MRPL32
	DCPS	0.454135	4.47775e-28			CDR2	0.417376	4.58265e-09		MRPL37
	DCTPP1	0.530924	1.62488e-39			CENPA	0.402306	1.80515e-08		MRPL4
	DDX28	0.429523	5.55433e-25			CENPK	0.424666	2.30359e-09		MRPL55
	DDX49	0.425289	1.78555e-24			CENPM	0.400002	2.21287e-08		MRPL9
	DDX56	0.503193	4.79518e-35			CENPW	0.405472	1.36105e-08		MRPS12
	DENR	0.473073	1.23898e-30			CEP350	-0.48294	5.03633e-12		MRPS24
	DGUOK	0.481897	7.00754e-32			CHAF1B	0.494241	1.33486e-12		MXI1
	DLD	0.474181	8.67826e-31			CHCHD2	0.458075	7.923e-11		MYBL2
	DNAJB6	0.522274	4.46216e-38			CHCHD3	0.416315	5.05852e-09		NALCN
	DNAJC2	0.605371	8.32539e-54			CHEK1	0.44551	2.93789e-10		NCLN
	DNAJC30	0.504032	3.55977e-35			CHEK2	0.456893	8.9831e-11		NDRG2
	DOCK1	-0.457862	1.4461e-28			CHMP2A	0.473015	1.55385e-11		NDUFA4L2
	DSCC1	0.417421	1.49724e-23			CHPF2	0.585897	3.68073e-18		NDUFB7
	DSN1	0.517937	2.26749e-37			CHST12	0.418955	3.95401e-09		NME1
	DST	-0.481133	9.01708e-32			CHST15	-0.437493	6.59506e-10		NOP16
	DTL	0.427326	1.0202e-24			CHSY3	0.403565	1.61396e-08		NR2C2AP
	DTYMK	0.46291	3.05949e-29			CITED1	0.432973	1.03085e-09		NRG3
	DYNLRB1	0.417139	1.61412e-23			CITED2	0.442417	4.02355e-10		NT5C2
	E2F1	0.540217	4.15111e-41			CKLF	0.410082	8.97385e-09		NT5C3A
	ECSCR	0.400183	1.30378e-21			CKS2	0.424281	2.38958e-09		NTRK2
	ECT2	0.415721	2.35301e-23			CLCC1	0.421085	3.23617e-09		NUDT15
	EIF3B	0.524305	2.06774e-38			CLCF1	0.407715	1.11225e-08		NXT1
	EIF3K	0.421045	5.66132e-24			CLEC11A	0.521155	4.61027e-14		OAZ1
	EIF6	0.502326	6.51597e-35			CLEC2B	0.402032	1.84949e-08		OCIAD2
	ELOF1	0.465156	1.5206e-29			CLIC1	0.454105	1.20565e-10		ORC5
	EPB41L2	-0.419182	9.34771e-24			CLPTM1L	0.442778	3.87896e-10		OSBPL11
	ERP29	0.439469	3.34834e-26			CMC1	0.40459	1.47287e-08		PCNA
	EZH2	0.414831	2.97894e-23			CMSS1	0.456404	9.46106e-11		PCOLCE
	FABP5	0.404411	4.46524e-22			CMTM4	-0.47325	1.51345e-11		PDAP1
	FAM136A	0.454597	3.89544e-28			CNIH4	0.52309	3.57731e-14		PDCL3
	FAM149B1	-0.433308	1.92837e-25			CNPY2	0.400165	2.18139e-08		PDIA4
	FAM168A	-0.407328	2.11256e-22			CNPY4	0.474618	1.29848e-11		PKMYT1
	FAM174C	0.465809	1.23941e-29			CNTN1	-0.448035	2.26738e-10		PLOD3
	FAM185A	0.466085	1.13658e-29			COA1	0.481987	5.62048e-12		PMPCB
	FAM200A	0.467964	6.29528e-30			COL1A2	0.439026	5.65904e-10		PMS2P1
	FAM220A	0.459408	9.01211e-29			COL3A1	0.402631	1.75375e-08		POC1A
	FAM3C	0.563915	2.10895e-45			COL4A1	0.429223	1.48589e-09		POLD2
	FANCI	0.417664	1.40322e-23			COL4A2	0.452951	1.36086e-10		POLR2H
	FARSB	0.436033	8.92904e-26			COL5A2	0.458041	7.95242e-11		POLR2J
	FASTK	0.503202	4.77984e-35			COL8A1	0.422975	2.70589e-09		POLR2L
	FAT1	-0.407187	2.19061e-22			COMMD7	0.430696	1.28783e-09		POP7
	FDX2	0.466653	9.51105e-30			COPG1	0.515656	9.39552e-14		POR
	FEN1	0.504101	3.47389e-35			COPS6	0.745388	1.58054e-33		PPARA
	FGF2	-0.430925	3.75952e-25			COX6B1	0.459325	6.9345e-11		PPIA
	FIBP	0.528923	3.52627e-39			CPE	-0.483964	4.47408e-12		PPM1L
	FIS1	0.450935	1.16895e-27			CPSF4	0.527619	1.9637e-14		PPP1R35
	FKBP1A	0.579796	1.76477e-48			CSDC2	-0.512302	1.44126e-13		PRC1
	FLAD1	0.45759	1.57126e-28			CSNK1G2	0.4382	6.14635e-10		PRELID1
	FLNB	-0.414453	3.29136e-23			CSTA	0.40761	1.12287e-08		PRKRIP1
	FLOT2	0.446279	4.63537e-27			CTA-384D8.36	0.404979	1.42251e-08		PSMA7
	FMC1	0.486559	1.4847e-32			CTB-1I21.1	-0.465002	3.75932e-11		PSMB3
	FOXM1	0.443048	1.19121e-26			CTB-50E14.5	-0.448416	2.18006e-10		PSMB4
	FOXO4	-0.527957	5.11718e-39			CTC-203F4.2	-0.436206	7.49413e-10		PSMC2
	GALNT13	-0.405513	3.36821e-22			CTD-2081K17.2	-0.406335	1.25947e-08		PSMD13
	GAN	-0.417236	1.57297e-23			CTD-2514K5.2	-0.469066	2.4084e-11		PSMD8
	GAPDH	0.43019	4.61456e-25			CTD-2555O16.2	-0.491468	1.85737e-12		PSMG1
	GARS1	0.525295	1.41826e-38			CTD-2647L4.4	-0.434248	9.0943e-10		PSMG3
	GEMIN7	0.421411	5.1283e-24			CTD-3199J23.4	-0.401609	1.92015e-08		PTCD1
	GGCT	0.578375	3.37914e-48			CUL1	0.502197	5.08874e-13		PTTG1
	GGH	0.503127	4.90855e-35			DAAM2	-0.570852	3.97391e-17		PUS7
	GGTA1P	-0.407626	1.95641e-22			DALRD3	0.480879	6.3829e-12		R3HDM4
	GINS1	0.484088	3.38893e-32			DAP3	0.435891	7.73169e-10		RAN
	GINS2	0.439012	3.81723e-26			DAZAP1	0.425632	2.10027e-09		RECQL4
	GJC1	0.412942	4.90041e-23			DBNL	0.428462	1.59958e-09		RFC2
	GLUD1	-0.40378	5.24479e-22			DCBLD2	0.405036	1.41522e-08		RINT1
	GLUD2	-0.422715	3.60223e-24			DCPS	0.424257	2.39526e-09		RMI2
	GNB2	0.578065	3.89314e-48			DCTPP1	0.530186	1.39219e-14		RNF25
	GPR75	-0.431523	3.18148e-25			DDHD1	-0.453349	1.30519e-10		RP9
	GPRC5B	-0.412696	5.2276e-23			DDOST	0.483199	4.88793e-12		RP9P
	GRK6	0.459485	8.80155e-29			DDX10	0.499006	7.51445e-13		RPA3
	GSS	0.473173	1.20015e-30			DDX49	0.436661	7.16378e-10		RPP40
	GSTK1	0.469166	4.30484e-30			DDX56	0.53148	1.16928e-14		SAE1
	GTF3A	0.443438	1.06342e-26			DGCR6	-0.41453	5.96771e-09		SAMD8
	GTPBP10	0.474232	8.53612e-31			DGUOK	0.556021	3.69325e-16		SDC1
	GUSB	0.428951	6.50959e-25			DHDDS	0.407246	1.16036e-08		SEC61G
	H2AZ1	0.473097	1.22974e-30			DHTKD1	-0.412813	6.99038e-09		SEPHS2
	HDAC3	0.481769	7.31022e-32			DIRAS3	0.440912	4.68312e-10		SFRP2
	HINT1	0.465712	1.2777e-29			DIS3L	-0.407688	1.1149e-08		SGCD
	HIPK2	-0.414189	3.52881e-23			DMRTA2	0.421214	3.19681e-09		SGMS1
	HPSE2	-0.41718	1.59683e-23			DNAJB11	0.453941	1.22662e-10		SLBP
	HSPBP1	0.401222	1.00338e-21			DNAJC2	0.640866	1.96438e-22		SLC35B1
	IFT22	0.533693	5.51269e-40			DNAJC30	0.427374	1.77666e-09		SLC37A3
	IGFBP2	0.465995	1.16943e-29			DNTTIP2	0.441577	4.37954e-10		SLC39A11
	IKZF5	-0.403468	5.678e-22			DOCK1	-0.416923	4.78017e-09		SMYD2
	IMMT	0.484701	2.76363e-32			DPY19L1	0.435612	7.94841e-10		SNRPB
	IMPDH1	0.605612	7.37754e-54			DSN1	0.430568	1.30397e-09		SNRPB2
	INSYN2B	-0.413847	3.8625e-23			E2F1	0.421268	3.18077e-09		SNRPC
	ITGB1BP1	0.422465	3.85555e-24			EBNA1BP2	0.459271	6.97456e-11		SNRPD2
	ITPA	0.431428	3.26666e-25			ECM1	0.521626	4.33493e-14		SPC24
	ITPR2	-0.411356	7.42569e-23			ECT2	0.43224	1.10762e-09		SPDYE3
	KCNN3	-0.42029	6.93981e-24			EFHD1	-0.453134	1.33503e-10		SSBP1
	KCTD17	0.402542	7.18366e-22			EGLN2	0.432246	1.10699e-09		STAP2
	KDELR2	0.51131	2.59812e-36			EIF2AK4	0.437263	6.74752e-10		SULT1C4
	KIAA1671	-0.402933	6.50597e-22			EIF2B3	0.405804	1.32107e-08		TACC3
	KIF2C	0.416606	1.86015e-23			EIF3I	0.464529	3.95796e-11		TBCA
	KIF4A	0.428792	6.80342e-25			EIF3K	0.558306	2.63856e-16		TBL2
	KIFC1	0.414774	3.02364e-23			EIF4G1	0.426346	1.9613e-09		TBRG4
	KLHL5	-0.486122	1.71907e-32			EIF4H	0.43674	7.10717e-10		TCF19
	KPNA2	0.46823	5.78765e-30			EIF5A	0.43031	1.33713e-09		TIMM22
	KRBA1	0.450532	1.31803e-27			EIF6	0.494623	1.27524e-12		TIMP1
	KTI12	0.409817	1.1091e-22			ELOF1	0.461108	5.72808e-11		TJP2
	LAGE3	0.444622	7.53121e-27			EMILIN1	0.412872	6.95272e-09		TK1
	LAMTOR4	0.496418	5.14948e-34			EMP3	0.407271	1.15771e-08		TMEM106C
	LIMK1	0.437697	5.56176e-26			EN1	0.470741	2.00115e-11		TMEM208
	LINC00836	-0.473957	9.32713e-31			ENHO	-0.419559	3.73606e-09		TMEM248
	LMAN2	0.455176	3.27031e-28			ENSA	0.415624	5.39337e-09		TMEM60
	LMNB2	0.413769	3.94209e-23			EPB41L2	-0.414553	5.95545e-09		TMSB10
	LRP1B	-0.481161	8.93251e-32			EPHX1	-0.423822	2.49656e-09		TMUB1
	LRWD1	0.560283	1.01103e-44			ERCC1	0.445091	3.06605e-10		TOMM40
	LSM4	0.62005	4.35289e-57			ERVK3-1	0.416863	4.80683e-09		TRAPPC1
	LSM5	0.484701	2.76396e-32			ETNPPL	-0.475867	1.12825e-11		TRIAP1
	LSM8	0.452248	7.89479e-28			EXO1	0.410688	8.49192e-09		TRIP13
	MAD1L1	0.496342	5.28784e-34			EXOC6B	-0.446582	2.63247e-10		TSTA3
	MALSU1	0.57896	2.58659e-48			EYA1	-0.423214	2.64506e-09		TXN
	MAP11	0.51901	1.51968e-37			FABP5	0.423791	2.50392e-09		UBE2S
	MAP2K2	0.410576	9.103e-23			FABP5P7	0.420334	3.47354e-09		UBE2T
	MAP3K5	-0.428065	8.32044e-25			FADS1	-0.501546	5.512e-13		UCHL3
	MBD3	0.40031	1.26295e-21			FADS2	-0.467659	2.81176e-11		UQCRQ
	MBLAC1	0.443171	1.14926e-26			FAM103A1	0.469901	2.19636e-11		USP54
	MCAT	0.537909	1.04334e-40			FAM107A	-0.403777	1.58372e-08		WASF3
	MCM2	0.471601	1.98505e-30			FAM109B	0.459674	6.68064e-11		WDFY3
	MCM4	0.442874	1.25287e-26			FAM126A	0.473633	1.45006e-11		WDFY3-AS2
	MCM6	0.443303	1.10621e-26			FAM133B	0.457831	8.13211e-11		WDR34
	MCM7	0.46524	1.48099e-29			FAM136A	0.494553	1.286e-12		WDR46
	MCTS1	0.401652	9.00127e-22			FAM167A	-0.408374	1.04784e-08		WRAP53
	MDH2	0.694388	9.09988e-77			FAM168A	-0.478279	8.58697e-12		YKT6
	MED10	0.48399	3.50219e-32			FAM169A	-0.403359	1.64383e-08		ZBTB8OS
	MED27	0.424519	2.20439e-24			FAM171A1	-0.452696	1.39767e-10		ZFAND2A
	MEST	0.408663	1.49626e-22			FAM189A2	-0.45068	1.72442e-10		ZMYND11
	METTL1	0.404111	4.82037e-22			FAM196B	-0.562119	1.4969e-16		ZNHIT1
	METTL2B	0.52865	3.91822e-39			FAM20C	0.471368	1.86665e-11		ZYX
	MIS18A	0.419274	9.12062e-24			FAM3C	0.460828	5.90318e-11
	MKRN1	0.43973	3.10677e-26			FASTK	0.525927	2.4594e-14
	MOSPD3	0.583685	2.93113e-49			FAT3	-0.491143	1.93028e-12
	MPDZ	-0.402154	7.92752e-22			FAXDC2	-0.531535	1.16051e-14
	MPLKIP	0.471995	1.75011e-30			FBLIM1	0.424958	2.24011e-09
	MRGBP	0.475238	6.17184e-31			FBXW9	0.460218	6.30244e-11
	MRM2	0.596372	7.06493e-52			FKBP11	0.457576	8.35544e-11
	MRM3	0.445901	5.17897e-27			FKBP1A	0.567725	6.41805e-17
	MRPL11	0.431121	3.55993e-25			FLAD1	0.494978	1.22208e-12
	MRPL15	0.414813	2.99279e-23			FLII	0.403929	1.56239e-08
	MRPL17	0.405081	3.76234e-22			FLNA	0.408934	9.9605e-09
	MRPL2	0.424713	2.09018e-24			FLOT1	0.413904	6.3228e-09
	MRPL22	0.413269	4.49668e-23			FMNL2	-0.407877	1.09608e-08
	MRPL32	0.501805	7.83147e-35			FOXO4	-0.564886	9.87383e-17
	MRPL37	0.409937	1.07496e-22			FRS2	-0.413205	6.7432e-09
	MRPL4	0.507427	1.05817e-35			FSTL5	-0.427974	1.67669e-09
	MRPL47	0.431898	2.8642e-25			FTSJ1	0.404058	1.5445e-08
	MRPL55	0.44254	1.3806e-26			FTSJ2	0.455354	1.05708e-10
	MRPL9	0.48178	7.28461e-32			FUT9	-0.498657	7.84024e-13
	MRPS12	0.486948	1.30309e-32			G0S2	0.543558	2.21167e-15
	MRPS17	0.464473	1.88203e-29			GABBR1	-0.494779	1.25164e-12
	MRPS24	0.414095	3.61744e-23			GABRG1	-0.420402	3.45115e-09
	MRPS33	0.540074	4.39532e-41			GALE	0.440163	5.0495e-10
	MSTO1	0.433614	1.76944e-25			GALNT13	-0.462995	4.67382e-11
	MTERF1	0.467717	6.80426e-30			GAN	-0.431441	1.19766e-09
	MXI1	-0.461194	5.20353e-29			GAPDH	0.417169	4.67192e-09
	MYBL2	0.464727	1.73824e-29			GAREML	-0.442176	4.12248e-10
	MYDGF	0.454965	3.48585e-28			GARS	0.642252	1.4935e-22
	NABP2	0.409871	1.09351e-22			GAS2L3	0.405729	1.32993e-08
	NALCN	-0.421265	5.33513e-24			GATSL3	-0.405773	1.32476e-08
	NAV2	-0.460378	6.69004e-29			GCLC	-0.463612	4.372e-11
	NAXE	0.409423	1.22871e-22			GDF15	0.442992	3.79582e-10
	NCAPG2	0.436514	7.7899e-26			GEMIN7	0.485902	3.57258e-12
	NCAPH	0.425855	1.52888e-24			GGCT	0.499014	7.50735e-13
	NCLN	0.420143	7.22091e-24			GGH	0.529689	1.48841e-14
	NDRG2	-0.405711	3.2016e-22			GGN	0.428248	1.63302e-09
	NDUFA4	0.520126	1.00122e-37			GGTA1P	-0.401847	1.88013e-08
	NDUFA4L2	0.414916	2.91226e-23			GINS1	0.402017	1.85194e-08
	NDUFAB1	0.414234	3.48791e-23			GJC1	0.451732	1.54567e-10
	NDUFB2	0.565411	1.09977e-45			GLA	0.518996	6.10579e-14
	NDUFB7	0.406183	2.83661e-22			GLB1	0.401008	2.02496e-08
	NEK7	-0.450805	1.21514e-27			GLUD1	-0.546377	1.48492e-15
	NME1	0.49187	2.46148e-33			GLUL	-0.411189	8.112e-09
	NOP16	0.424316	2.32964e-24			GNB2	0.597253	5.62211e-19
	NR2C2AP	0.452078	8.30543e-28			GNL2	0.448419	2.17928e-10
	NR2F6	0.451603	9.57369e-28			GPM6B	-0.469295	2.34829e-11
	NRG3	-0.436462	7.9058e-26			GPR3	0.401259	1.98048e-08
	NT5C2	-0.501161	9.82646e-35			GPR75	-0.56151	1.63945e-16
	NT5C3A	0.4889	6.75056e-33			GPR98	-0.480525	6.64644e-12
	NT5C3B	0.442729	1.30681e-26			GPRC5B	-0.422227	2.90492e-09
	NTHL1	0.403811	5.2037e-22			GPX8	0.42443	2.35597e-09
	NTRK2	-0.441898	1.66273e-26			GRAMD3	-0.466941	3.04197e-11
	NUB1	0.410883	8.40183e-23			GSTK1	0.47302	1.55291e-11
	NUDT1	0.484763	2.70691e-32			GTF2E2	0.46269	4.8307e-11
	NUDT15	0.424301	2.33928e-24			GTF3A	0.455154	1.07966e-10
	NUF2	0.428066	8.31636e-25			GTPBP10	0.446315	2.70547e-10
	NUSAP1	0.405726	3.18921e-22			GUSB	0.485459	3.76157e-12
	NXT1	0.402762	6.79405e-22			HADHB	-0.414027	6.25185e-09
	OAZ1	0.427685	9.24072e-25			HAX1	0.447208	2.46855e-10
	OCIAD2	0.418096	1.25041e-23			HDAC3	0.460132	6.36079e-11
	OPN1SW	0.478362	2.23748e-31			HDAC8	0.436814	7.05527e-10
	ORAI2	0.438122	4.92613e-26			HEATR2	0.400545	2.10948e-08
	ORC5	0.728713	4.84648e-88			HERC2P3	-0.511064	1.68601e-13
	ORC6	0.464102	2.11214e-29			HEXB	0.454586	1.14628e-10
	OSBPL11	-0.442186	1.52968e-26			HIPK2	-0.50474	3.71904e-13
	PARD3	-0.40855	1.54084e-22			HMGN5	-0.412891	6.94081e-09
	PARD3B	-0.405123	3.72226e-22			HOGA1	-0.428503	1.59324e-09
	PBK	0.461606	4.58183e-29			HOTAIRM1	0.492773	1.59067e-12
	PCNA	0.431596	3.11705e-25			HOXA5	0.429668	1.42314e-09
	PCOLCE	0.458178	1.31335e-28			HOXB3	0.440277	4.99193e-10
	PDAP1	0.648918	4.47686e-64			HOXD10	0.451766	1.54015e-10
	PDCL3	0.494894	8.72149e-34			HPSE2	-0.521938	4.16159e-14
	PDIA4	0.456506	2.18572e-28			HSPA4	0.476142	1.09378e-11
	PELO	0.401553	9.22843e-22			HSPB11	0.499292	7.25772e-13
	PFKFB3	-0.416446	1.94143e-23			HSPB8	-0.425703	2.08599e-09
	PGAM5	0.48421	3.25443e-32			HSPG2	0.445505	2.93938e-10
	PIMREG	0.460478	6.48848e-29			HTRA3	0.410211	8.86906e-09
	PKMYT1	0.466071	1.14187e-29			HYAL3	0.470773	1.99426e-11
	PLEKHJ1	0.453104	6.10676e-28			IER5	0.427112	1.82194e-09
	PLOD3	0.446168	4.78965e-27			IER5L	0.464999	3.7605e-11
	PMPCB	0.561955	4.92536e-45			IFI30	0.405651	1.33937e-08
	PMS2P1	0.676318	1.89096e-71			IFNGR2	0.514576	1.07885e-13
	POC1A	0.516491	3.8778e-37			IFRD1	0.422335	2.87528e-09
	POLA2	0.449492	1.79565e-27			IFRD2	0.416449	4.99583e-09
	POLD2	0.470161	3.13969e-30			IGF2BP2	0.43203	1.13059e-09
	POLR2E	0.488794	6.99679e-33			IGF2BP3	0.400239	2.16709e-08
	POLR2H	0.407654	1.94219e-22			IGFBP2	0.52704	2.12129e-14
	POLR2J	0.441215	2.02564e-26			IGFBP4	0.428131	1.65156e-09
	POLR2L	0.43297	2.12074e-25			IKBIP	0.440674	4.79681e-10
	POLR3K	0.469126	4.35966e-30			IKZF5	-0.42492	2.24821e-09
	POP7	0.678142	5.7173e-72			IL1RAPL1	-0.409517	9.44707e-09
	POR	0.432633	2.33152e-25			IMMT	0.538307	4.59889e-15
	PPARA	-0.471016	2.39211e-30			IMPDH1	0.458215	7.8063e-11
	PPIA	0.675438	3.35641e-71			INPP1	-0.403162	1.67285e-08
	PPIAP22	0.543185	1.25607e-41			ITGB3BP	0.47367	1.44404e-11
	PPM1G	0.424373	2.29373e-24			ITPA	0.52208	4.08476e-14
	PPM1L	-0.435211	1.12716e-25			ITPK1	-0.429748	1.4122e-09
	PPP1R35	0.524293	2.07678e-38			KCNB1	-0.514026	1.15741e-13
	PRC1	0.441381	1.93071e-26			KCNJ10	-0.55042	8.33225e-16
	PRELID1	0.522914	3.504e-38			KCNN3	-0.479822	7.20327e-12
	PRKRIP1	0.52195	5.04343e-38			KDELR1	0.454873	1.11205e-10
	PRR7	0.412541	5.44484e-23			KDELR2	0.491213	1.91442e-12
	PSMA1	0.484655	2.80622e-32			KDELR3	0.497454	9.06981e-13
	PSMA2	0.508058	8.43492e-36			KIAA0101	0.443002	3.79197e-10
	PSMA7	0.443228	1.13058e-26			KIAA1109	-0.49028	2.13776e-12
	PSMB3	0.424648	2.12798e-24			KIAA1161	-0.469152	2.38566e-11
	PSMB4	0.409009	1.36812e-22			KIAA1671	-0.42007	3.56093e-09
	PSMB6	0.409479	1.21092e-22			KIAA2026	-0.406544	1.23607e-08
	PSMC2	0.542496	1.65982e-41			KIF23	0.40203	1.84987e-08
	PSMC3	0.407465	2.03909e-22			KLF15	-0.427321	1.78576e-09
	PSMD13	0.404107	4.82537e-22			KLHL32	-0.452593	1.41269e-10
	PSMD8	0.406049	2.93596e-22			KLHL5	-0.458991	7.18607e-11
	PSMG1	0.467848	6.52982e-30			KMT2A	-0.434237	9.10367e-10
	PSMG3	0.68566	3.76499e-74			KPNA2	0.541412	2.9878e-15
	PTCD1	0.579834	1.73358e-48			KSR2	-0.479648	7.34718e-12
	PTN	0.413046	4.76874e-23			KTI12	0.492784	1.58847e-12
	PTTG1	0.533137	6.85652e-40			LAMB1	0.475584	1.16474e-11
	PURA	-0.443541	1.03203e-26			LAMTOR2	0.464556	3.94638e-11
	PUS7	0.506365	1.54906e-35			LAMTOR4	0.525697	2.53575e-14
	PWAR5	-0.419086	9.59177e-24			LDHA	0.424312	2.38254e-09
	R3HDM4	0.501354	9.18162e-35			LEPRE1	0.480183	6.91147e-12
	RAB18	-0.406054	2.9322e-22			LIFR	-0.506394	3.02868e-13
	RAB5IF	0.451813	8.99109e-28			LIG1	0.428534	1.58848e-09
	RAC1	0.4314	3.29279e-25			LIMCH1	-0.442199	4.11316e-10
	RAD51C	0.41921	9.27716e-24			LIMK1	0.439087	5.62453e-10
	RAE1	0.522613	3.92655e-38			LINC00152	0.538232	4.64687e-15
	RAN	0.450949	1.16388e-27			LINC00263	-0.4333	9.98258e-10
	RARS1	0.48356	4.0395e-32			LINC00339	0.419535	3.7443e-09
	RASSF4	-0.41203	6.22595e-23			LINC00665	0.404145	1.53262e-08
	RCC1L	0.570536	1.15161e-46			LINC00672	-0.427626	1.73395e-09
	RECQL4	0.449552	1.76391e-27			LINC00844	-0.40608	1.28875e-08
	RFC2	0.629267	3.0757e-59			LINC01088	-0.45755	8.37797e-11
	RFC4	0.460297	6.85898e-29			LIX1	-0.451512	1.58153e-10
	RHBDD2	0.466338	1.05006e-29			LLGL1	-0.435605	7.95423e-10
	RHEB	0.470122	3.17953e-30			LMCD1-AS1	-0.420368	3.46236e-09
	RIN1	0.425853	1.52985e-24			LONP1	0.406784	1.20961e-08
	RINT1	0.44614	4.82916e-27			LOX	0.532907	9.63692e-15
	RITA1	0.438215	4.79571e-26			LOXL1	0.435449	8.0776e-10
	RMI2	0.524873	1.66553e-38			LPHN2	0.458321	7.71838e-11
	RNASEH2A	0.491832	2.4936e-33			LPHN3	-0.402702	1.74277e-08
	RNF25	0.447014	3.73515e-27			LRP1B	-0.469462	2.30563e-11
	RNPS1	0.413749	3.96355e-23			LRRC37A17P	-0.520795	4.8319e-14
	RP9	0.459263	9.42154e-29			LRRC8A	-0.51381	1.18973e-13
	RP9P	0.551382	4.34388e-43			LRWD1	0.546858	1.38683e-15
	RPA3	0.57219	5.51332e-47			LSM10	0.44907	2.03765e-10
	RPL26L1	0.431805	2.94048e-25			LSM12	0.416047	5.18577e-09
	RPP40	0.456684	2.07026e-28			LSM4	0.593445	1.0645e-18
	RPUSD1	0.40626	2.7806e-22			LSM5	0.495659	1.12616e-12
	RRM2	0.467661	6.92556e-30			LSM7	0.417175	4.66956e-09
	RRP1	0.419773	7.97688e-24			LUZP2	-0.446948	2.53537e-10
	RRP36	0.413888	3.82025e-23			LXN	0.430945	1.25702e-09
	SAE1	0.477089	3.38749e-31			LYPLA1	0.445325	2.99384e-10
	SAMD8	-0.459878	7.80174e-29			LYPLA2	0.518049	6.90291e-14
	SDC1	0.475846	5.06889e-31			MAD1L1	0.591664	1.43051e-18
	SEC61G	0.44503	6.68531e-27			MAGOH	0.479956	7.09327e-12
	SELENOH	0.423386	3.00214e-24			MALSU1	0.575546	1.9163e-17
	SEM1	0.537704	1.13162e-40			MANF	0.40702	1.18424e-08
	SEPHS2	0.430803	3.88945e-25			MAP2K2	0.453337	1.30693e-10
	SFRP2	-0.411603	6.96171e-23			MAP2K3	0.494381	1.31273e-12
	SGCD	-0.459222	9.54144e-29			MBD4	0.418284	4.21028e-09
	SGMS1	-0.426373	1.32644e-24			MCAT	0.415166	5.62705e-09
	SLBP	0.460507	6.43014e-29			MCF2L2	-0.454709	1.1315e-10
	SLC25A11	0.446678	4.12238e-27			MCM2	0.417077	4.71219e-09
	SLC35A2	0.406869	2.37774e-22			MCM6	0.406039	1.29353e-08
	SLC35B1	0.410428	9.45922e-23			MDH2	0.545707	1.63296e-15
	SLC37A3	0.422988	3.34518e-24			MED10	0.501513	5.53429e-13
	SLC39A11	-0.410682	8.85421e-23			MED18	0.419686	3.69177e-09
	SLC39A3	0.489112	6.28328e-33			MED8	0.514125	1.1429e-13
	SLC52A2	0.421691	4.75531e-24			MEF2BNB	0.50003	6.63424e-13
	SMKR1	0.53375	5.39196e-40			MEGF9	-0.403246	1.66051e-08
	SMYD2	0.427866	8.78887e-25			MESDC1	0.434741	8.66313e-10
	SNAPC5	0.437938	5.19182e-26			METTL7B	0.423821	2.49668e-09
	SNRPB	0.47227	1.60266e-30			MFSD10	0.415396	5.50851e-09
	SNRPB2	0.459791	8.0126e-29			MGAT4B	0.533986	8.32136e-15
	SNRPC	0.423015	3.32032e-24			MGAT4C	-0.488786	2.5494e-12
	SNRPD2	0.4489	2.14018e-27			MGP	0.403683	1.59706e-08
	SNX18	-0.43904	3.7868e-26			MICAL3	-0.411235	8.0778e-09
	SORBS1	-0.469201	4.25793e-30			MICALL2	0.41161	7.80586e-09
	SPAG5	0.403842	5.16178e-22			MIF	0.518481	6.52747e-14
	SPC24	0.504265	3.27719e-35			MIPEP	0.469521	2.29044e-11
	SPDYE12P	0.423539	2.87944e-24			MIPOL1	-0.476578	1.04128e-11
	SPDYE3	0.660895	3.33508e-67			MIR4435-1HG	0.502767	4.74439e-13
	SRP19	0.456023	2.53035e-28			MIS18A	0.433187	1.00941e-09
	SRPRB	0.404671	4.17829e-22			MMD2	-0.467218	2.95128e-11
	SSBP1	0.631181	1.07679e-59			MOSPD3	0.526948	2.14747e-14
	STAP2	0.410561	9.13718e-23			MOXD1	0.438602	5.90442e-10
	STON1	-0.415556	2.45871e-23			MPLKIP	0.528915	1.65132e-14
	SULT1C4	-0.40293	6.51055e-22			MPV17	0.420184	3.52277e-09
	SUMO1	0.416402	1.96377e-23			MRGBP	0.540992	3.16782e-15
	TACC3	0.449714	1.68078e-27			MRO	-0.527929	1.88417e-14
	TAF3	-0.422044	4.32203e-24			MRPL11	0.407738	1.10995e-08
	TATDN2	0.414651	3.12424e-23			MRPL12	0.41507	5.67722e-09
	TBCA	0.437993	5.1107e-26			MRPL15	0.416711	4.87552e-09
	TBL2	0.576027	9.82324e-48			MRPL17	0.471456	1.84858e-11
	TBRG4	0.523095	3.2716e-38			MRPL2	0.445562	2.92222e-10
	TCF19	0.476893	3.60927e-31			MRPL20	0.488733	2.56544e-12
	TECPR1	0.467171	8.08238e-30			MRPL22	0.515676	9.37131e-14
	TEDC2	0.466479	1.00444e-29			MRPL32	0.632153	1.06636e-21
	TFB2M	0.415939	2.22112e-23			MRPL37	0.5217	4.29296e-14
	THOC3	0.414247	3.47511e-23			MRPL4	0.50423	3.96128e-13
	TIMM22	0.544227	8.23241e-42			MRPL55	0.474195	1.36158e-11
	TIMP1	0.419272	9.12504e-24			MRPL9	0.48911	2.4541e-12
	TJP2	-0.470518	2.80284e-30			MRPS12	0.571587	3.54734e-17
	TK1	0.484479	2.97574e-32			MRPS15	0.487602	2.92921e-12
	TLR4	-0.449268	1.91861e-27			MRPS21	0.410203	8.87518e-09
	TMED4	0.460598	6.25191e-29			MRPS24	0.581823	7.09574e-18
	TMEM106C	0.461481	4.76225e-29			MRVI1	-0.529986	1.43003e-14
	TMEM11	0.433491	1.83159e-25			MTERFD1	0.448622	2.13406e-10
	TMEM159	0.416594	1.86624e-23			MTMR10	-0.433272	1.00104e-09
	TMEM161A	0.425303	1.7789e-24			MTSS1L	-0.458338	7.7048e-11
	TMEM203	0.406003	2.97057e-22			MUC12	0.452759	1.38844e-10
	TMEM205	0.416273	2.03239e-23			MXI1	-0.524052	3.15174e-14
	TMEM208	0.434877	1.23915e-25			MYBL2	0.406635	1.22598e-08
	TMEM248	0.424826	2.02681e-24			MYH15	-0.401435	1.94993e-08
	TMEM250	0.407858	1.8427e-22			MYL12A	0.40785	1.09872e-08
	TMEM60	0.585972	1.00838e-49			MYL12B	0.456028	9.84533e-11
	TMSB10	0.42483	2.02474e-24			MYO5B	0.40197	1.85971e-08
	TMUB1	0.466066	1.1436e-29			MYO6	-0.405617	1.34337e-08
	TNIK	-0.446241	4.6884e-27			NAA10	0.420618	3.38176e-09
	TOMM34	0.432332	2.53644e-25			NAA20	0.408477	1.03815e-08
	TOMM40	0.448883	2.15092e-27			NAA38	0.409875	9.14405e-09
	TONSL	0.410564	9.13197e-23			NALCN	-0.446929	2.54035e-10
	TOR3A	0.449719	1.67833e-27			NANS	0.415705	5.35299e-09
	TPI1	0.410294	9.79652e-23			NARF	0.439198	5.56248e-10
	TPX2	0.448484	2.42037e-27			NAT14	0.458552	7.53085e-11
	TRAIP	0.482153	6.43906e-32			NCAM1	-0.400814	2.05995e-08
	TRAPPC1	0.417797	1.35437e-23			NCAM2	-0.498994	7.52506e-13
	TRIAP1	0.459582	8.54352e-29			NCLN	0.465344	3.62207e-11
	TRIP13	0.530204	2.14898e-39			NCOA1	-0.431077	1.24085e-09
	TRMT6	0.423237	3.12601e-24			NDC1	0.449626	1.92362e-10
	TSPAN17	0.458832	1.0751e-28			NDRG2	-0.566793	7.39609e-17
	TSTA3	0.425447	1.70989e-24			NDUFA11	0.464434	3.99889e-11
	TUBG1	0.486084	1.74086e-32			NDUFA3	0.425392	2.14897e-09
	TXN	0.463219	2.7805e-29			NDUFA4L2	0.424917	2.24888e-09
	TYMS	0.450261	1.42855e-27			NDUFA9	0.425149	2.19968e-09
	UBE2C	0.431758	2.97911e-25			NDUFAF4	0.444109	3.38871e-10
	UBE2D4	0.40564	3.26028e-22			NDUFB7	0.498266	8.22049e-13
	UBE2F	0.412482	5.52976e-23			NDUFS5	0.498265	8.22136e-13
	UBE2S	0.514586	7.83499e-37			NDUFS6	0.400719	2.0773e-08
	UBE2T	0.517084	3.11246e-37			NDUFS8	0.476194	1.08736e-11
	UCHL3	0.473623	1.0386e-30			NDUFV3	0.402702	1.74269e-08
	UFSP1	0.467152	8.13186e-30			NEBL	-0.419642	3.70706e-09
	UQCR11	0.457087	1.83138e-28			NEK2	0.403014	1.69511e-08
	UQCRQ	0.438373	4.58371e-26			NET1	-0.532876	9.67834e-15
	URGCP	0.427983	8.51056e-25			NF1	-0.46236	5.00595e-11
	USP54	-0.465778	1.25157e-29			NGLY1	0.432407	1.08964e-09
	VPS13D	-0.465356	1.42823e-29			NKAIN3	-0.410512	8.62925e-09
	WASF3	-0.410579	9.09471e-23			NKAIN4	-0.49811	8.37774e-13
	WDFY3	-0.494291	1.07365e-33			NME1	0.467813	2.76455e-11
	WDFY3-AS2	-0.42903	6.36851e-25			NME1-NME2	0.497404	9.12451e-13
	WDR34	0.454025	4.6284e-28			NOC2L	0.441031	4.6273e-10
	WDR46	0.455459	3.00246e-28			NOP10	0.455691	1.02016e-10
	WDR83OS	0.411547	7.06344e-23			NOP16	0.405553	1.35115e-08
	WIPI2	0.51687	3.3694e-37			NOX4	0.41874	4.03419e-09
	WRAP53	0.417794	1.35528e-23			NR2C2AP	0.488411	2.66415e-12
	YKT6	0.465659	1.2989e-29			NRBP1	0.434762	8.64444e-10
	ZBTB47	-0.410838	8.50017e-23			NRD1	0.456391	9.47375e-11
	ZBTB8OS	0.411791	6.62792e-23			NRG3	-0.519208	5.94037e-14
	ZC3HC1	0.58668	7.23488e-50			NRXN1	-0.422745	2.76564e-09
	ZDHHC4	0.461409	4.86943e-29			NSMF	-0.428739	1.5572e-09
	ZFAND2A	0.460455	6.53286e-29			NSUN5P2	0.480888	6.37626e-12
	ZKSCAN5	0.447669	3.07916e-27			NT5C1A	-0.440475	4.89357e-10
	ZMYND11	-0.46856	5.21456e-30			NT5C2	-0.515861	9.15098e-14
	ZMYND19	0.404361	4.5221e-22			NT5C3A	0.474316	1.34318e-11
	ZNF212	0.428337	7.71724e-25			NTAN1	0.469559	2.2809e-11
	ZNF282	0.405104	3.73985e-22			NTRK2	-0.582622	6.24301e-18
	ZNF3	0.416018	2.17467e-23			NUDT15	0.400125	2.18899e-08
	ZNF394	0.492822	1.77763e-33			NUP205	0.495223	1.18663e-12
	ZNF398	0.403229	6.03338e-22			NUP85	0.473697	1.43975e-11
	ZNF746	0.410026	1.05047e-22			NUP93	0.433524	9.76593e-10
	ZNF775	0.424031	2.51789e-24			NXT1	0.442593	3.95248e-10
	ZNF786	0.426001	1.46886e-24			OAZ1	0.534921	7.3244e-15
	ZNF815P	0.419049	9.68695e-24			OCIAD2	0.423934	2.47016e-09
	ZNHIT1	0.531683	1.20969e-39			OMG	-0.403915	1.56434e-08
	ZWILCH	0.4224	3.92352e-24			ORAI1	0.435964	7.67638e-10
	ZYX	0.471507	2.04556e-30			ORC5	0.614699	2.70034e-20
						OSBPL11	-0.417555	4.50702e-09
						OST4	0.455358	1.05665e-10
						OTUD7A	-0.506078	3.1502e-13
						P2RY11	0.434434	8.92906e-10
						P4HB	0.430125	1.36143e-09
						PAIP2B	-0.424043	2.44459e-09
						PAM16	0.476075	1.10202e-11
						PAQR6	-0.40857	1.02942e-08
						PAQR8	-0.412036	7.50689e-09
						PARPBP	0.408275	1.05727e-08
						PARVB	0.400214	2.17196e-08
						PBLD	-0.441379	4.46811e-10
						PC	-0.489543	2.33215e-12
						PCBP1	0.440555	4.85468e-10
						PCGF1	0.404714	1.45662e-08
						PCNA	0.429836	1.40011e-09
						PCOLCE	0.515182	9.98398e-14
						PCSK6	-0.408554	1.03091e-08
						PDAP1	0.412553	7.15939e-09
						PDCD2L	0.434756	8.64978e-10
						PDCD5	0.525783	2.50695e-14
						PDCL3	0.449876	1.87446e-10
						PDIA4	0.467577	2.83729e-11
						PDIA5	0.438884	5.74025e-10
						PDLIM1	0.496484	1.01972e-12
						PDLIM4	0.405897	1.31012e-08
						PDLIM7	0.408382	1.0471e-08
						PDP2	-0.408583	1.02825e-08
						PDPN	0.414755	5.8452e-09
						PDZD8	-0.463527	4.41239e-11
						PEA15	-0.526457	2.29242e-14
						PER3	-0.415646	5.38244e-09
						PHF14	0.486865	3.19301e-12
						PHLPP1	-0.456742	9.12802e-11
						PHTF1	0.433708	9.59081e-10
						PHTF2	0.409236	9.69074e-09
						PHYHIPL	-0.411568	7.83593e-09
						PIK3IP1	-0.455996	9.87804e-11
						PKIB	0.417423	4.56245e-09
						PKM	0.41281	6.99256e-09
						PKMYT1	0.41436	6.06235e-09
						PLAT	0.415066	5.67925e-09
						PLAUR	0.430954	1.25581e-09
						PLEC	-0.403312	1.6507e-08
						PLEKHB1	-0.474526	1.31199e-11
						PLEKHO1	0.400378	2.14076e-08
						PLOD3	0.431178	1.2287e-09
						PLP1	-0.401015	2.02373e-08
						PMM2	0.4547	1.13252e-10
						PMPCB	0.484978	3.97813e-12
						PMS2P1	0.450126	1.82665e-10
						POC1A	0.454197	1.19404e-10
						POLD1	0.47455	1.30847e-11
						POLD2	0.402644	1.75181e-08
						POLR2H	0.493479	1.46212e-12
						POLR2J	0.476597	1.039e-11
						POLR2K	0.463859	4.25648e-11
						POLR2L	0.500873	5.98505e-13
						POMGNT1	0.431017	1.24819e-09
						POP4	0.481653	5.83995e-12
						POP7	0.66873	5.97974e-25
						POR	0.486602	3.29259e-12
						POSTN	0.43669	7.14255e-10
						PPARA	-0.515833	9.18356e-14
						PPIA	0.611769	4.55561e-20
						PPIB	0.40754	1.12994e-08
						PPIH	0.475589	1.16412e-11
						PPM1K	-0.424632	2.31101e-09
						PPM1L	-0.479459	7.50742e-12
						PPP1CA	0.430996	1.25071e-09
						PPP1R35	0.616039	2.12218e-20
						PPP2R5A	-0.451072	1.65568e-10
						PPP4C	0.45994	6.49295e-11
						PRC1	0.41709	4.70635e-09
						PREB	0.434384	8.97333e-10
						PRELID1	0.519636	5.61929e-14
						PRKD2	0.427355	1.77979e-09
						PRKRIP1	0.42322	2.64369e-09
						PRLHR	-0.454537	1.15215e-10
						PRMT1	0.422647	2.79157e-09
						PRR24	0.422582	2.80862e-09
						PSMA4	0.469823	2.21541e-11
						PSMA5	0.466532	3.18146e-11
						PSMA7	0.40505	1.41348e-08
						PSMB2	0.43567	7.90301e-10
						PSMB3	0.492764	1.59222e-12
						PSMB4	0.482663	5.1994e-12
						PSMC2	0.634346	7.00151e-22
						PSMC4	0.452611	1.41005e-10
						PSMD1	0.42259	2.8067e-09
						PSMD13	0.485302	3.83105e-12
						PSMD8	0.490346	2.12125e-12
						PSMG1	0.49155	1.83949e-12
						PSMG3	0.584514	4.60373e-18
						PSMG4	0.412652	7.09501e-09
						PTCD1	0.457537	8.39001e-11
						PTGFRN	0.592723	1.20018e-18
						PTP4A3	0.457467	8.45245e-11
						PTPN11	-0.400864	2.0509e-08
						PTPN2	0.433264	1.00184e-09
						PTPN9	0.401509	1.93717e-08
						PTPRB	-0.411773	7.69031e-09
						PTPRT	-0.413157	6.77289e-09
						PTTG1	0.480625	6.57137e-12
						PTX3	0.455338	1.05894e-10
						PUS7	0.483474	4.73518e-12
						PVRL2	0.432441	1.08609e-09
						PVT1	0.424169	2.41534e-09
						QPCTL	0.464325	4.04671e-11
						R3HDM4	0.528301	1.7927e-14
						RAB34	0.442073	4.16583e-10
						RAB5B	-0.525503	2.60168e-14
						RABL5	0.473111	1.53719e-11
						RAN	0.409181	9.73955e-09
						RANBP3L	-0.495329	1.17167e-12
						RAPGEF2	-0.405963	1.30229e-08
						RARS	0.459206	7.02324e-11
						RECQL4	0.503448	4.36302e-13
						RER1	0.403598	1.6092e-08
						REXO2	0.447486	2.39912e-10
						RFC2	0.598731	4.37783e-19
						RFTN2	-0.423429	2.59155e-09
						RGS16	0.44327	3.69023e-10
						RGS3	0.40417	1.52919e-08
						RHBDL3	-0.448408	2.18184e-10
						RINT1	0.552739	5.96058e-16
						RMI2	0.418265	4.21783e-09
						RNF145	0.410485	8.65016e-09
						RNF219-AS1	-0.493066	1.53609e-12
						RNF25	0.418119	4.27565e-09
						RP11-122G18.5	-0.432556	1.07388e-09
						RP11-133F8.2	-0.463225	4.55915e-11
						RP11-143K11.1	-0.406441	1.24754e-08
						RP11-156P1.3	-0.406445	1.24708e-08
						RP11-158M2.5	-0.411322	8.0142e-09
						RP11-161H23.5	0.426861	1.86655e-09
						RP11-163E9.2	0.447205	2.46951e-10
						RP11-275H4.1	-0.411617	7.80064e-09
						RP11-298J20.4	-0.42417	2.41501e-09
						RP11-303E16.2	0.449796	1.89021e-10
						RP11-38L15.3	-0.48527	3.84539e-12
						RP11-395B7.4	0.418163	4.25802e-09
						RP11-395G23.3	0.412697	7.06521e-09
						RP11-441F2.5	-0.445118	3.05786e-10
						RP11-47I22.1	-0.484458	4.22545e-12
						RP11-513M16.8	-0.45037	1.78085e-10
						RP11-579D7.2	0.41025	8.83752e-09
						RP11-61I13.3	-0.496848	9.75851e-13
						RP11-626G11.3	0.451369	1.60512e-10
						RP11-64B16.2	-0.426979	1.8455e-09
						RP11-65J3.1	0.419903	3.61704e-09
						RP11-932O9.7	-0.415764	5.32365e-09
						RP11-983P16.4	-0.405738	1.32886e-08
						RP9	0.463	4.67136e-11
						RP9P	0.458828	7.31244e-11
						RPA3	0.444403	3.28878e-10
						RPF2	0.42583	2.06071e-09
						RPL28	0.401893	1.87245e-08
						RPL36	0.440517	4.87312e-10
						RPN1	0.424176	2.41371e-09
						RPP40	0.431938	1.14087e-09
						RPS6KA5	-0.43401	9.30957e-10
						RRP9	0.402149	1.83048e-08
						RSBN1L-AS1	0.419745	3.67115e-09
						RTCA	0.435091	8.36855e-10
						S100A4	0.407374	1.14699e-08
						SAE1	0.423221	2.64338e-09
						SAMD8	-0.483178	4.89988e-12
						SASH1	-0.572317	3.16866e-17
						SCD	-0.52187	4.19842e-14
						SCMH1	0.403818	1.57792e-08
						SCO2	0.441677	4.33565e-10
						SCYL1	0.411635	7.78784e-09
						SDC1	0.465917	3.40267e-11
						SDF4	0.439068	5.63522e-10
						SDHB	0.456314	9.5518e-11
						SEC24D	0.413141	6.78321e-09
						SEC61G	0.542428	2.59171e-15
						SEL1L3	0.478432	8.43916e-12
						SELL	-0.467233	2.94646e-11
						SEPHS2	0.481829	5.72354e-12
						SERINC5	-0.402863	1.71792e-08
						SERPINH1	0.442264	4.08609e-10
						SESTD1	-0.42163	3.07363e-09
						SFRP2	-0.485393	3.79046e-12
						SGCD	-0.540814	3.24756e-15
						SGMS1	-0.481196	6.15476e-12
						SH3BGRL3	0.448162	2.23791e-10
						SHANK2	-0.415744	5.33388e-09
						SHCBP1	0.447204	2.46973e-10
						SHFM1	0.436602	7.20532e-10
						SHISA5	0.533605	8.76518e-15
						SIAH2	0.411227	8.0838e-09
						SLBP	0.4686	2.53545e-11
						SLC15A2	-0.471393	1.86157e-11
						SLC16A9	-0.409024	9.87951e-09
						SLC1A4	-0.454596	1.14507e-10
						SLC20A1	0.451153	1.64164e-10
						SLC24A4	-0.480483	6.67878e-12
						SLC25A18	-0.419127	3.89045e-09
						SLC25A19	0.439317	5.49687e-10
						SLC25A21-AS1	-0.47955	7.42999e-12
						SLC25A39	0.420105	3.54906e-09
						SLC25A48	-0.483187	4.89429e-12
						SLC30A5	0.426536	1.92569e-09
						SLC35B1	0.409419	9.53113e-09
						SLC37A3	0.426728	1.89049e-09
						SLC39A11	-0.483357	4.79948e-12
						SLC4A2	0.429164	1.49453e-09
						SLC4A4	-0.438384	6.03411e-10
						SLC9A1	0.456528	9.3375e-11
						SLCO1A2	-0.523027	3.60751e-14
						SMAD9	-0.427035	1.83558e-09
						SMC4	0.426746	1.88735e-09
						SMIM4	0.584688	4.47671e-18
						SMOC1	-0.441063	4.6124e-10
						SMS	0.479081	7.83844e-12
						SMYD2	0.473995	1.39242e-11
						SNAPC2	0.44933	1.98358e-10
						SNRNP40	0.43563	7.93407e-10
						SNRPA1	0.408941	9.95398e-09
						SNRPB	0.493831	1.40191e-12
						SNRPB2	0.411014	8.24274e-09
						SNRPC	0.470491	2.05738e-11
						SNRPD2	0.602429	2.32864e-19
						SNX19	-0.423932	2.47052e-09
						SPAG4	0.411492	7.89037e-09
						SPARCL1	-0.506166	3.11605e-13
						SPATA2L	0.456089	9.78172e-11
						SPC24	0.42485	2.26331e-09
						SPDYE3	0.506393	3.02922e-13
						SPINK8	0.401233	1.98512e-08
						SPIRE1	-0.463026	4.65846e-11
						SPON2	0.45202	1.49981e-10
						SRA1	0.428342	1.61815e-09
						SRM	0.496919	9.67583e-13
						SRRT	0.441455	4.43414e-10
						SRSF2	0.457054	8.83176e-11
						SRSF7	0.418669	4.06134e-09
						SRSF9	0.4241	2.43126e-09
						SSBP1	0.549481	9.53536e-16
						SSBP4	0.470602	2.03225e-11
						SSTR2	-0.413694	6.44645e-09
						SSU72	0.423887	2.48111e-09
						STAC	0.430903	1.26207e-09
						STAP2	0.441959	4.21389e-10
						STC1	0.449071	2.03734e-10
						STEAP3	0.434154	9.17851e-10
						STOML2	0.429094	1.50468e-09
						SULT1C4	-0.48517	3.89001e-12
						SUMF2	0.437712	6.45244e-10
						SYCE1L	0.410068	8.98529e-09
						SYT15	-0.404085	1.54076e-08
						TACC3	0.463364	4.49123e-11
						TAF12	0.45394	1.22676e-10
						TAF6	0.44304	3.77754e-10
						TAF9	0.431401	1.20231e-09
						TAGLN2	0.460536	6.09139e-11
						TBCA	0.438671	5.86376e-10
						TBL2	0.476921	1.00164e-11
						TBRG4	0.458453	7.611e-11
						TCEAL2	-0.424114	2.42797e-09
						TCF19	0.405141	1.40195e-08
						THOC7	0.468439	2.58089e-11
						THRA	-0.438463	5.98653e-10
						TIMM22	0.447841	2.31313e-10
						TIMP1	0.508704	2.2694e-13
						TJP1	-0.473266	1.51083e-11
						TJP2	-0.506725	2.9065e-13
						TK1	0.460126	6.36476e-11
						TM4SF1	0.401068	2.01423e-08
						TMED3	0.450665	1.72721e-10
						TMED9	0.417811	4.40021e-09
						TMEM106C	0.502369	4.98262e-13
						TMEM107	0.409389	9.5572e-09
						TMEM147	0.400327	2.15035e-08
						TMEM170B	-0.41656	4.94458e-09
						TMEM208	0.421032	3.25239e-09
						TMEM230	0.418827	4.00156e-09
						TMEM234	0.420661	3.36808e-09
						TMEM248	0.472885	1.57659e-11
						TMEM39B	0.446318	2.70463e-10
						TMEM51	0.438736	5.82541e-10
						TMEM60	0.525315	2.66746e-14
						TMEM70	0.483787	4.56678e-12
						TMEM71	0.428764	1.55343e-09
						TMOD2	-0.424636	2.31005e-09
						TMSB10	0.502826	4.7099e-13
						TMSB4X	0.459439	6.85063e-11
						TMUB1	0.554324	4.73367e-16
						TNFAIP6	0.442142	4.13673e-10
						TNFRSF12A	0.404545	1.47884e-08
						TNFRSF14	0.404922	1.42975e-08
						TNFRSF4	0.429924	1.38818e-09
						TNR	-0.422875	2.73171e-09
						TOM1L2	-0.470683	2.01426e-11
						TOMM40	0.520167	5.24436e-14
						TOMM5	0.409212	9.71192e-09
						TPCN1	-0.407089	1.17684e-08
						TPM3	0.417477	4.53991e-09
						TPM4	0.402279	1.80942e-08
						TRAPPC1	0.452268	1.46158e-10
						TRIAP1	0.42056	3.40023e-09
						TRIM16L	-0.404739	1.45339e-08
						TRIM8	-0.407424	1.14182e-08
						TRIP13	0.479931	7.11416e-12
						TRMT112	0.554797	4.41799e-16
						TSTA3	0.450543	1.74913e-10
						TTC26	0.420859	3.30593e-09
						TTC4	0.449799	1.88945e-10
						TTC9C	0.400147	2.18484e-08
						TTPA	-0.446147	2.75237e-10
						TTYH2	-0.476767	1.01922e-11
						TTYH3	0.445972	2.80228e-10
						TUBB	0.403337	1.64702e-08
						TUBB4B	0.443866	3.47364e-10
						TWF2	0.532844	9.71999e-15
						TXN	0.501111	5.8132e-13
						TXNDC12	0.427658	1.72857e-09
						TXNDC17	0.470002	2.17189e-11
						TXNDC5	0.430196	1.35198e-09
						UAP1	0.420655	3.37e-09
						UBASH3B	0.467902	2.73779e-11
						UBE2J2	0.454605	1.14399e-10
						UBE2S	0.525302	2.67196e-14
						UBE2T	0.440463	4.89944e-10
						UBE3C	0.485215	3.86991e-12
						UCHL3	0.406515	1.2393e-08
						ULBP2	0.480481	6.68041e-12
						UNC45A	0.500802	6.03744e-13
						UPP1	0.469068	2.40807e-11
						UQCRQ	0.479109	7.81349e-12
						USH1C	-0.444059	3.40599e-10
						USP2	-0.474607	1.30012e-11
						USP46	-0.546743	1.40969e-15
						USP54	-0.580086	9.36123e-18
						UTP18	0.401047	2.018e-08
						UXT	0.417476	4.54018e-09
						VAC14	0.41352	6.55059e-09
						VASP	0.401186	1.99343e-08
						VAV3	0.456177	9.69064e-11
						VEPH1	-0.402831	1.72291e-08
						VKORC1	0.452706	1.3961e-10
						VMP1	0.406092	1.2873e-08
						VRK1	0.449403	1.96868e-10
						WASF3	-0.41635	5.04213e-09
						WBSCR16	0.470192	2.1268e-11
						WBSCR22	0.61724	1.7083e-20
						WDFY3	-0.552649	6.03899e-16
						WDFY3-AS2	-0.536079	6.25096e-15
						WDR13	0.422966	2.70817e-09
						WDR34	0.434877	8.54711e-10
						WDR46	0.43519	8.28729e-10
						WDR54	0.40443	1.49412e-08
						WDR62	0.405639	1.34082e-08
						WRAP53	0.426354	1.95979e-09
						YIF1B	0.430483	1.31482e-09
						YIPF1	0.469651	2.25795e-11
						YIPF2	0.526164	2.38345e-14
						YKT6	0.414086	6.21789e-09
						YTHDF2	0.446659	2.61188e-10
						Z83840.1	-0.400765	2.069e-08
						ZBTB48	0.411395	7.96042e-09
						ZBTB8OS	0.534924	7.32223e-15
						ZCCHC24	-0.45876	7.36545e-11
						ZFAND2A	0.403176	1.67078e-08
						ZMYND11	-0.513177	1.28957e-13
						ZNF593	0.554297	4.75211e-16
						ZNF655	0.415318	5.54823e-09
						ZNF787	0.407117	1.17389e-08
						ZNF789	0.411412	7.94811e-09
						ZNHIT1	0.560564	1.88794e-16
						ZYX	0.558825	2.44375e-16

## Sheet: Supplementary Table 6
Supplementary Table 6. Results of KEGG enrichment analysis for 282 genes.
ID	Description	GeneRatio	BgRatio	pvalue	p.adjust	qvalue	geneID	Count
hsa05016	Huntington disease	24/88	306/8673	1.73626e-15	1.59736e-13	1.18796e-13	5694/5693/4711/7388/4702/9167/5440/4706/10213/1327/5695/25981/7419/5691/7416/7417/11258/1351/54539/1173/9377/1350/4724/5710	24
hsa05020	Prion disease	21/88	272/8673	1.86386e-13	8.57376e-12	6.37637e-12	5694/5693/4711/7388/10963/4702/9167/4706/10213/1327/5695/7419/5691/7416/7417/1351/54539/9377/1350/4724/5710	21
hsa05012	Parkinson disease	20/88	266/8673	1.26356e-12	3.87492e-11	2.8818e-11	5694/5693/4711/7388/4702/9167/4706/10213/1327/5695/7419/5691/7416/7417/1351/54539/9377/1350/4724/5710	20
hsa05010	Alzheimer disease	22/88	384/8673	1.86505e-11	4.28961e-10	3.19021e-10	5694/5693/4711/7388/4702/2597/9167/4706/10213/1327/5695/7419/1020/5691/7416/7417/1351/54539/9377/1350/4724/5710	22
hsa05022	Pathways of neurodegeneration - multiple diseases	23/88	476/8673	1.86488e-10	3.43138e-09	2.55194e-09	5694/5693/4711/7388/4702/9167/4706/10213/1327/5695/25981/7419/1020/5691/7416/7417/11258/1351/54539/9377/1350/4724/5710	23
hsa05014	Amyotrophic lateral sclerosis	20/88	364/8673	3.84301e-10	5.89262e-09	4.38238e-09	5694/5693/4711/7388/4702/9167/4706/10213/1327/5695/25981/5691/7416/11258/1351/54539/9377/1350/4724/5710	20
hsa05415	Diabetic cardiomyopathy	15/88	203/8673	1.45847e-09	1.91685e-08	1.42557e-08	4711/7388/4702/2597/9167/4706/1327/7419/7416/7417/1351/54539/9377/1350/4724	15
hsa00190	Oxidative phosphorylation	12/88	134/8673	8.51891e-09	9.79675e-08	7.28591e-08	4711/7388/4702/9167/4706/1327/5464/1351/54539/9377/1350/4724	12
hsa05208	Chemical carcinogenesis - reactive oxygen species	14/88	223/8673	4.38217e-08	4.47955e-07	3.33147e-07	4711/7388/4702/9167/4706/1327/7419/7416/7417/1351/54539/9377/1350/4724	14
hsa04714	Thermogenesis	14/88	232/8673	7.20531e-08	6.62888e-07	4.92995e-07	91942/4711/7388/388753/4702/9167/4706/1327/1351/54539/9377/29078/1350/4724	14
hsa03010	Ribosome	12/88	170/8673	1.23069e-07	1.0293e-06	7.65501e-07	64963/51121/55173/10573/29088/64928/51187/219927/11222/51081/65005/63875	12
hsa04932	Non-alcoholic fatty liver disease	11/88	155/8673	4.08048e-07	3.12837e-06	2.32659e-06	4711/7388/4702/9167/4706/1327/1351/54539/9377/1350/4724	11
hsa03050	Proteasome	6/88	46/8673	6.21378e-06	4.39745e-05	3.27041e-05	5694/5693/10213/5695/5691/5710	6
hsa05017	Spinocerebellar ataxia	9/88	143/8673	1.32315e-05	8.69501e-05	6.46654e-05	5694/5693/10213/5695/7419/5691/7416/7417/5710	9
hsa04260	Cardiac muscle contraction	6/88	87/8673	0.000240298	0.00147383	0.0010961	7388/9167/1327/1351/9377/1350	6
hsa05132	Salmonella infection	9/88	247/8673	0.000856451	0.00492459	0.00366245	79026/3326/83658/375/2597/51143/11258/55845/10552	9
hsa03008	Ribosome biogenesis in eukaryotes	6/88	167/8673	0.00687435	0.0372024	0.0276677	5901/3692/10799/55651/55272/10248	6
hsa01232	Nucleotide metabolism	4/88	85/8673	0.0107373	0.0548797	0.0408144	79077/4830/1716/115024	4
hsa04979	Cholesterol metabolism	3/88	51/8673	0.0148046	0.0716853	0.0533129	7419/7416/7417	3
hsa04723	Retrograde endocannabinoid signaling	5/88	148/8673	0.0170713	0.078528	0.0584018	4711/4702/4706/54539/4724	5
hsa00240	Pyrimidine metabolism	3/88	58/8673	0.0208548	0.0913638	0.0679479	79077/4830/115024	3
hsa04217	Necroptosis	5/88	159/8673	0.0225269	0.0942033	0.0700597	5478/3326/7419/7416/7417	5
hsa03250	Viral life cycle - HIV-1	3/88	63/8673	0.0258908	0.103563	0.0770208	5901/5478/6827	3
hsa00010	Glycolysis / Gluconeogenesis	3/88	67/8673	0.0303486	0.116336	0.08652	5230/2597/7167	3
hsa03060	Protein export	2/88	31/8673	0.0391295	0.14294	0.106305	58477/6728	2
hsa01230	Biosynthesis of amino acids	3/88	75/8673	0.040396	0.14294	0.106305	5230/2597/7167	3
hsa03020	RNA polymerase	2/88	34/8673	0.0462988	0.157759	0.117326	5440/51728	2
